# Supplementary material for: Influence of intramolecular π–π and H-bonding interactions on pyrazolylimine nickel-catalyzed ethylene polymerization and co-polymerization
Source: Royal Society of Chemistry journal article supplement (doi:10.1039/d1nj02437j), 2021-01-01
Supplement: d1nj02437j1.pdf [file d1nj02437j1.pdf]

## Supporting Information

Department of Polymer Science and Engineering, University of Science and Technology of China, Hefei, China.

### Table of Contents

|                                                            |    |
|------------------------------------------------------------|----|
| 1. Basic formulas.....                                     | 2  |
| 2. Spectra Data.....                                       | 2  |
| 2.1 <sup>1</sup> H and <sup>13</sup> C NMR of Ligands..... | 2  |
| 2.2 ESI for ligand.....                                    | 4  |
| 2.3 MALDI-TOF of Complexes.....                            | 5  |
| 2.4 <sup>1</sup> H of polymer.....                         | 6  |
| 2.5 DSC of polymer.....                                    | 14 |
| 2.6 GPC of polymer.....                                    | 22 |
| 3. X-ray Crystallography.....                              | 36 |

## 1. Basic Formulas

Branch density (BD) was analyzed using  $^1\text{H}$  NMR spectroscopy:

$$\text{BD} = 1000 \times (2/3) \times (I_{\text{CH}_3}) / (I_{\text{CH}_2 \text{ and CH}} + I_{\text{CH}_3}).$$

Incorporation of Methyl 10-undecenoate<sup>[1]</sup>

$$= \frac{\frac{I_{(\text{COOCH}_3)}}{3}}{\frac{I_{(\text{COOCH}_3)}}{3} + \frac{I_{(\text{CH}_2)} + I_{(\text{CH}_3)} - 15}{4}} * 100\%$$

## 2. Spectra Data

### 2.1 $^1\text{H}$ and $^{13}\text{C}$ NMR of Ligands

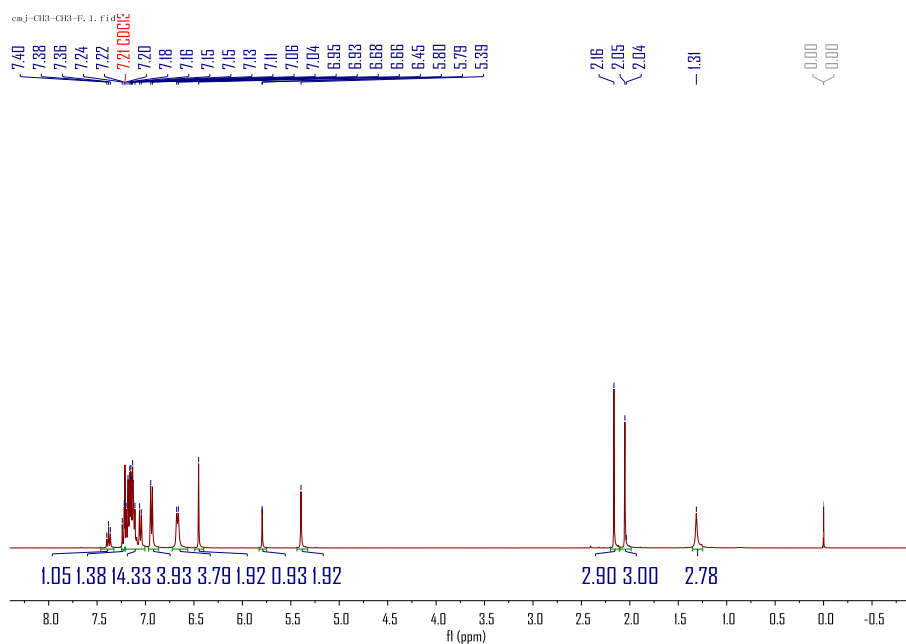

**Figure S1.**  $^1\text{H}$  NMR spectrum of L-1 in  $\text{CDCl}_3$ .

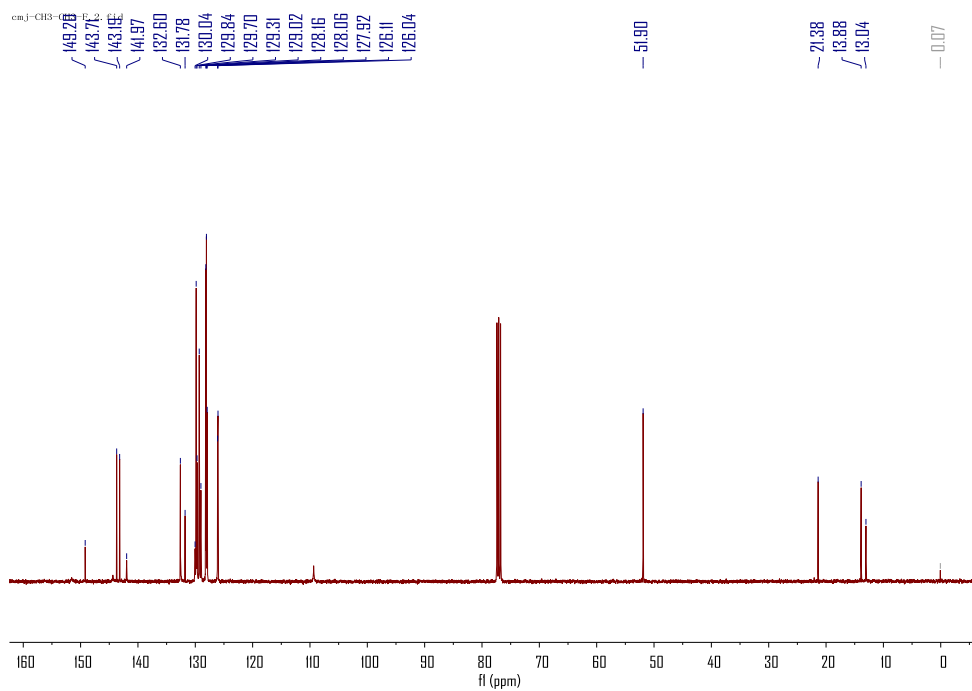

**Figure S2.**  $^{13}\text{C}$  NMR spectrum of **L-1** in  $\text{CDCl}_3$ .

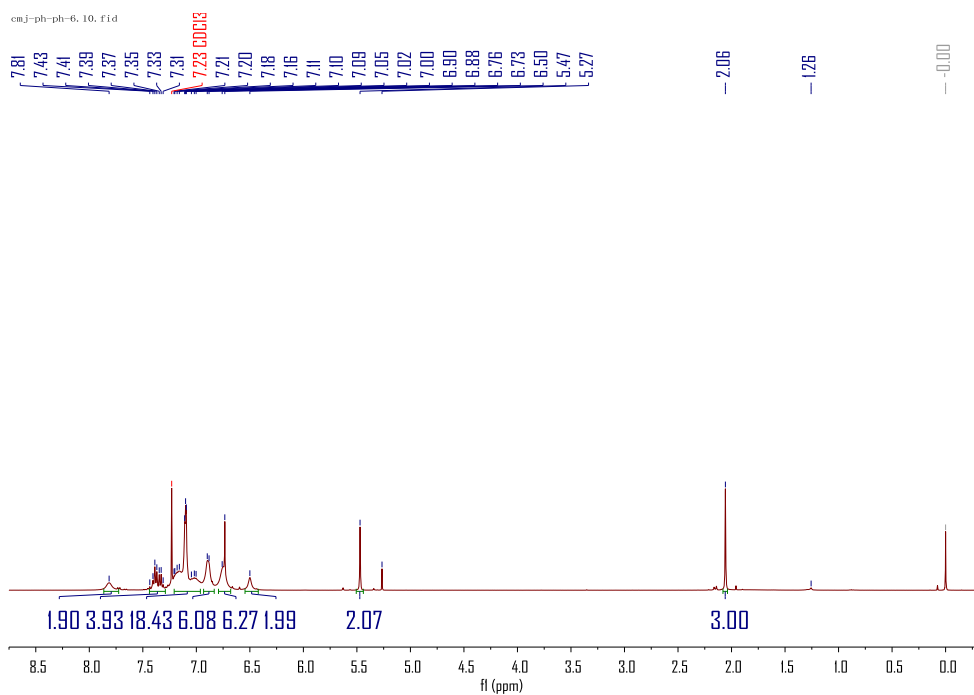

**Figure S3.**  $^1\text{H}$  NMR spectrum of **L-2** in  $\text{CDCl}_3$ .

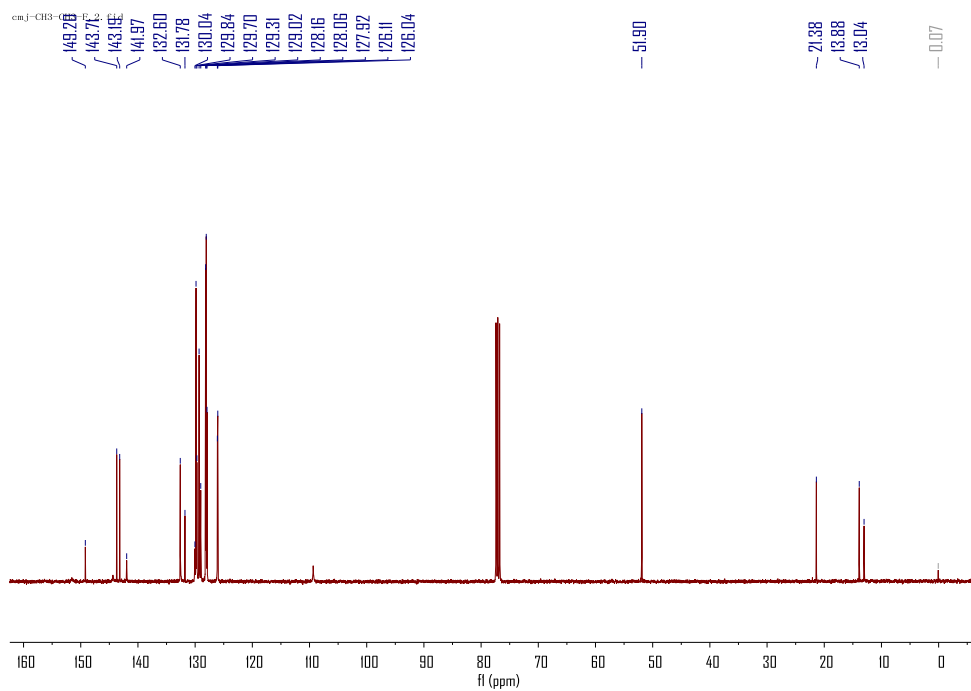

Figure S4. <sup>13</sup>C NMR spectrum of L-2 in CDCl<sub>3</sub>.

## 2.2 ESI for ligand

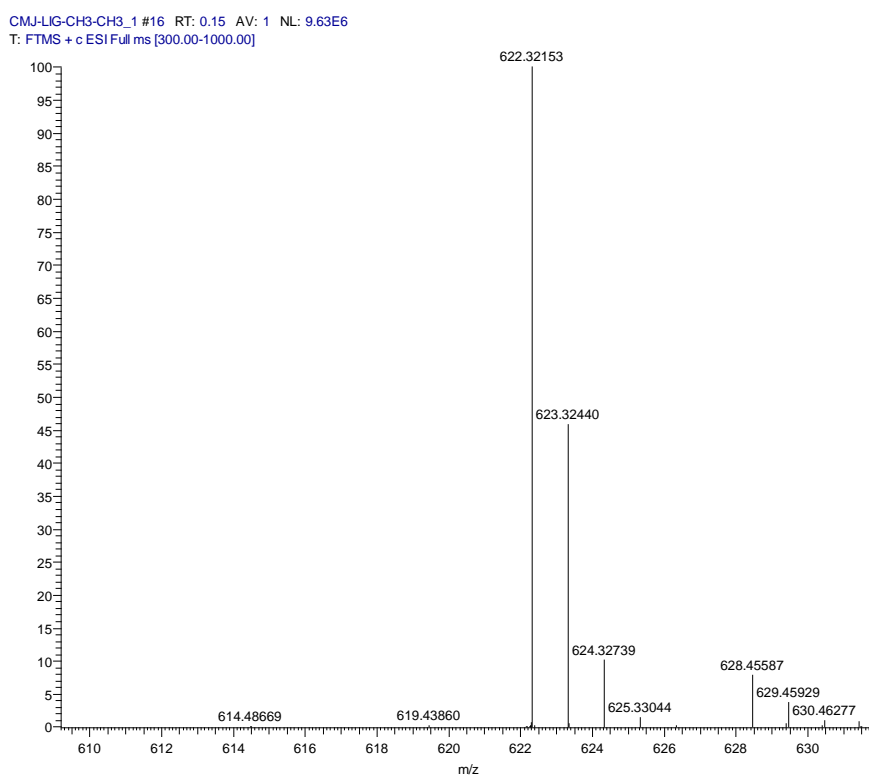

Figure S5. ESI of Ligand of L-1.

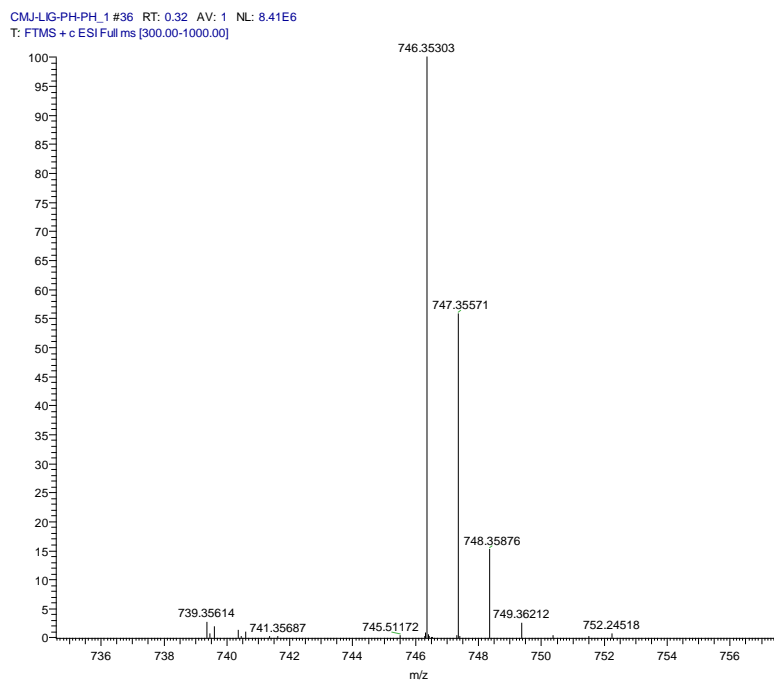

**Figure S6.** ESI of Ligand L-2.

### 2.3 MALDI-TOF of Complexes.

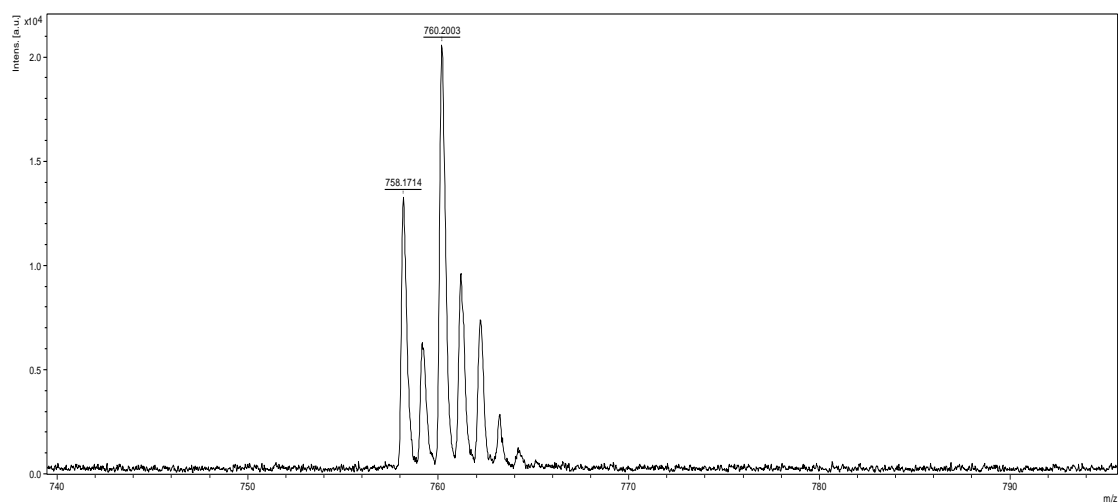

**Figure S7.** MALDI-TOF of Complexes Ni-1.

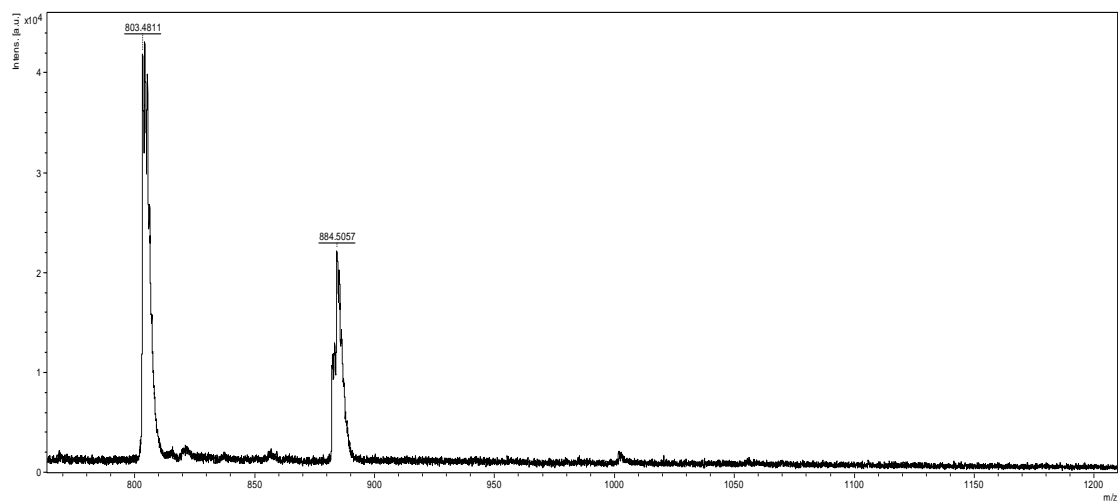

Figure S8. MALDI-TOF of Complexes Ni-2.

## 2.4 $^1\text{H}$ of polymer.

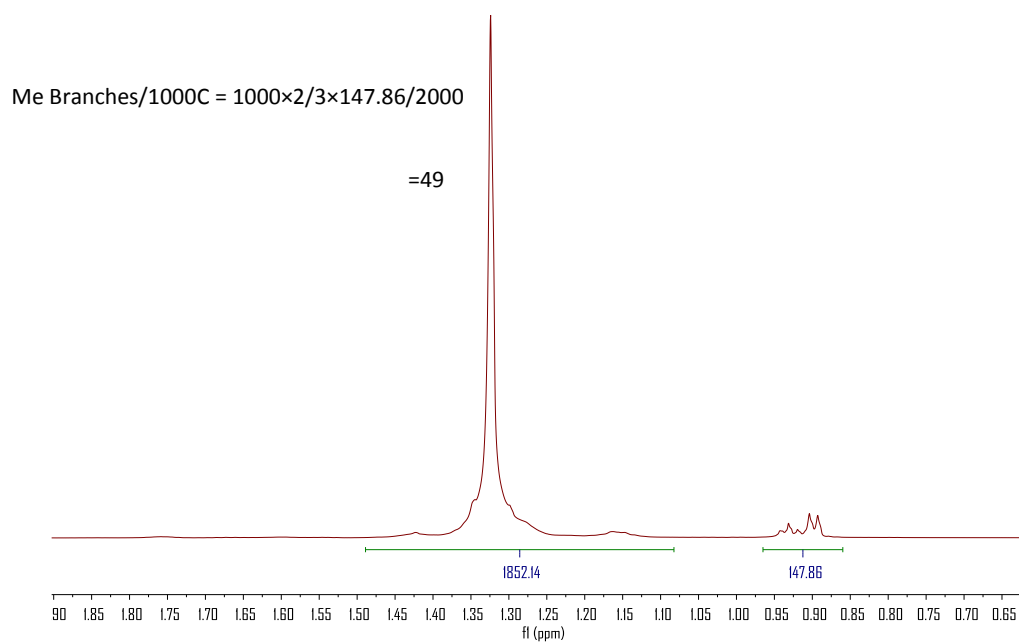

Figure S9.  $^1\text{H}$  NMR spectrum of the polymer from table 1, entry 1 ( $\text{C}_2\text{D}_2\text{Cl}_4$ ,  $120^\circ\text{C}$ ).

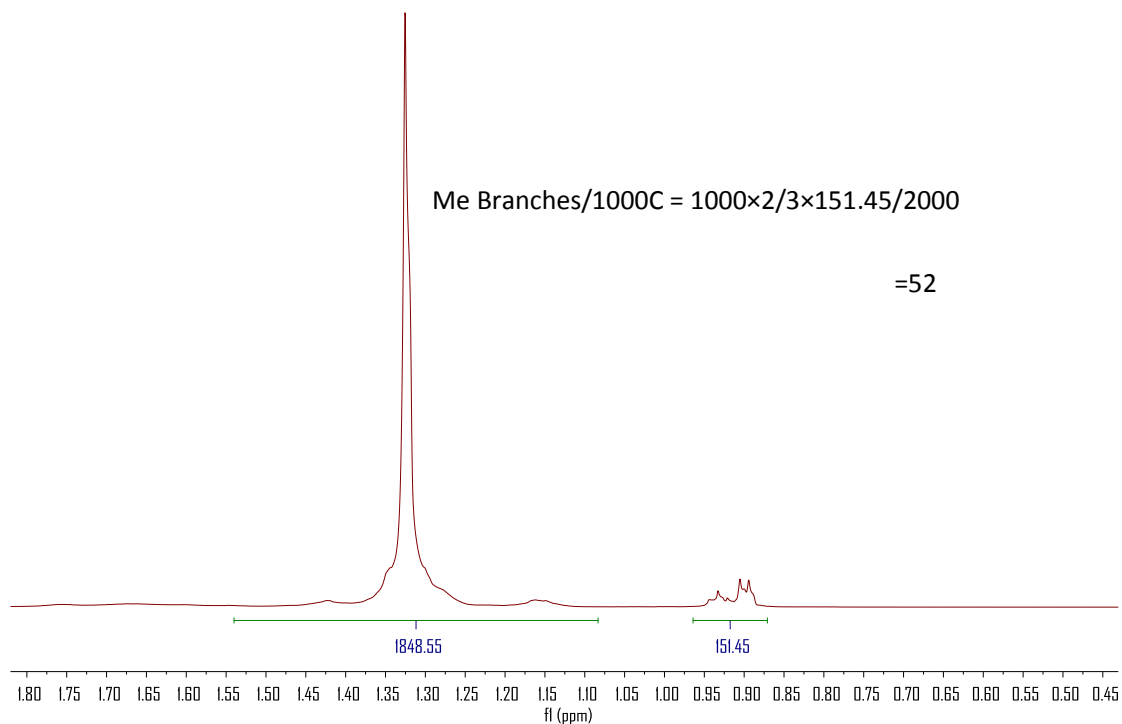

**Figure S10.**  $^1\text{H}$  NMR spectrum of the polymer from table 1, entry 2 ( $\text{C}_2\text{D}_2\text{Cl}_4$ ,  $120^\circ\text{C}$ )

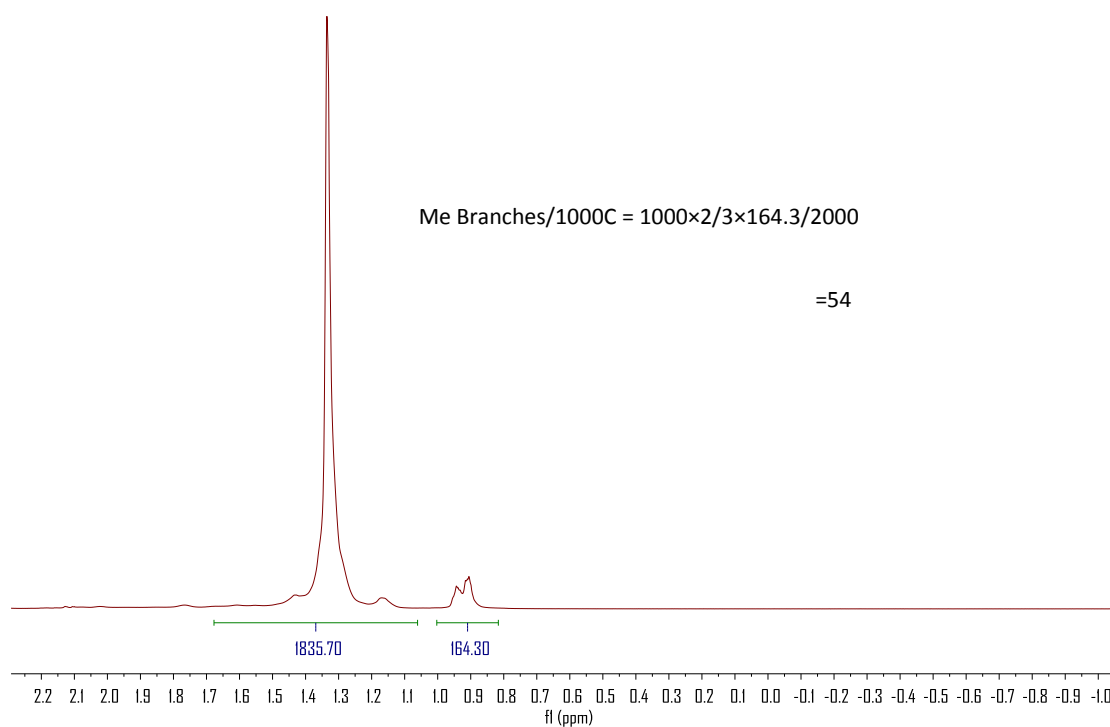

**Figure S11.**  $^1\text{H}$  NMR spectrum of the polymer from table 1, entry 3 ( $\text{C}_2\text{D}_2\text{Cl}_4$ ,  $120^\circ\text{C}$ )

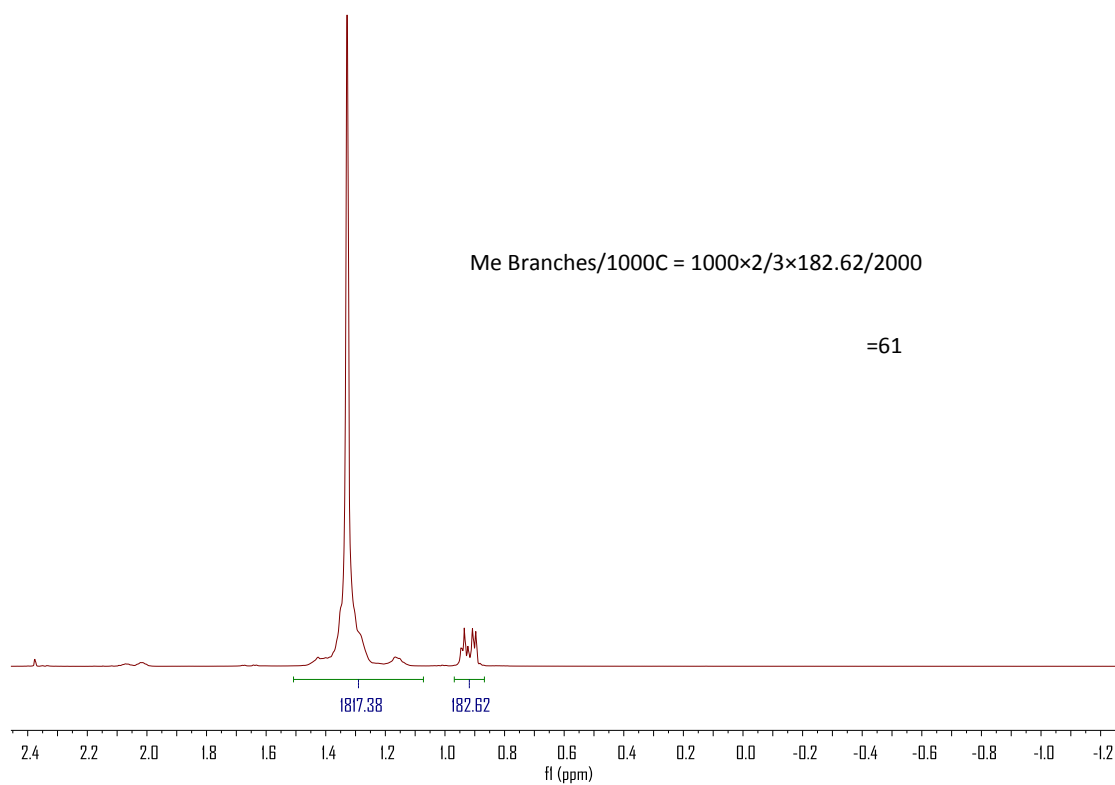

**Figure S12.**  $^1\text{H}$  NMR spectrum of the polymer from table 1, entry 4 ( $\text{C}_2\text{D}_2\text{Cl}_4$ ,  $120^\circ\text{C}$ )

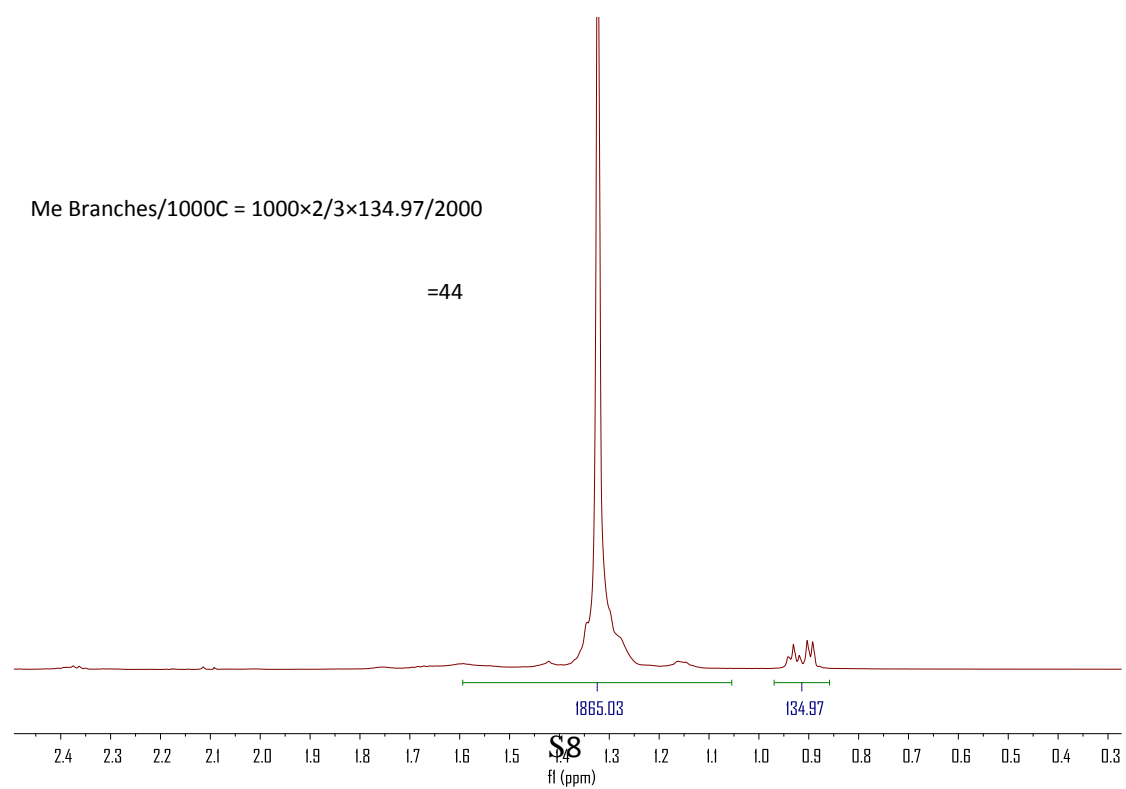



**Figure S13.**  $^1\text{H}$  NMR spectrum of the polymer from table 1, entry 5 ( $\text{C}_2\text{D}_2\text{Cl}_4$ ,  $120^\circ\text{C}$ )

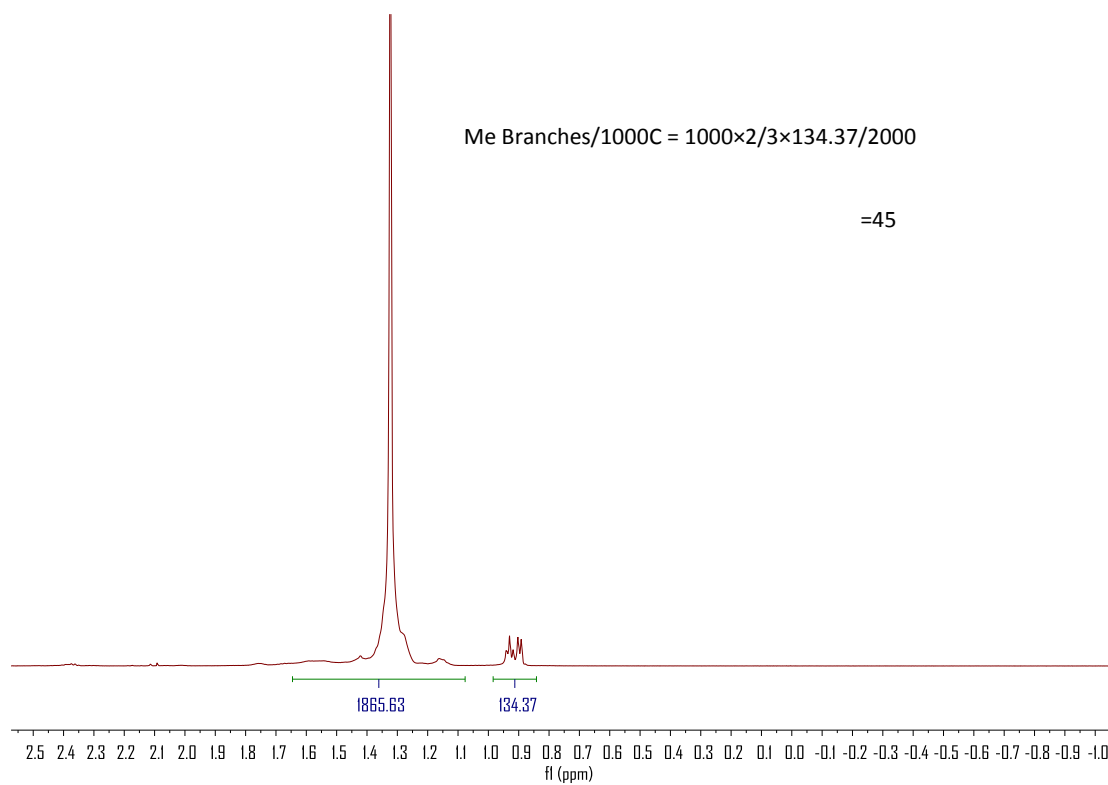

**Figure S14.**  $^1\text{H}$  NMR spectrum of the polymer from table 1, entry 6 ( $\text{C}_2\text{D}_2\text{Cl}_4$ ,  $120^\circ\text{C}$ )

$$\text{Me Branches}/1000\text{C} = 1000 \times \frac{2}{3} \times 135.46 / 2000$$

=45

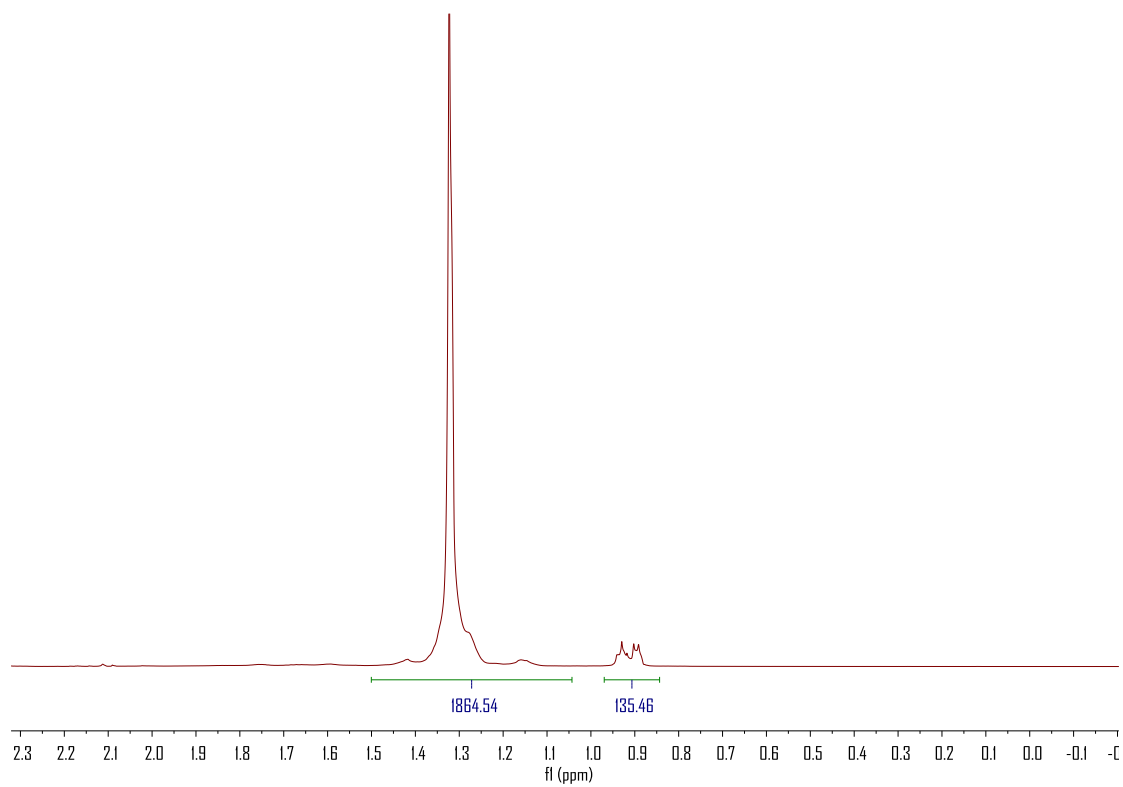

**Figure S15.** <sup>1</sup>H NMR spectrum of the polymer from table 1, entry 7 (C<sub>2</sub>D<sub>2</sub>Cl<sub>4</sub>, 120°C)

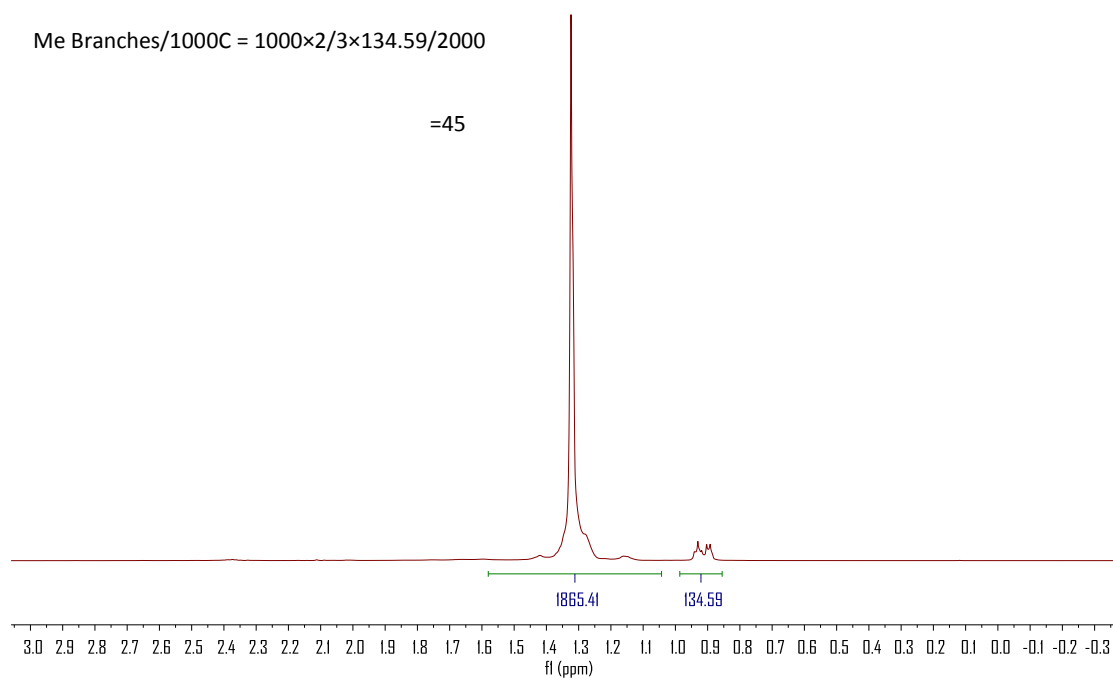

**Figure S16.** <sup>1</sup>H NMR spectrum of the polymer from table 1, entry 8 (C<sub>2</sub>D<sub>2</sub>Cl<sub>4</sub>, 120°C)

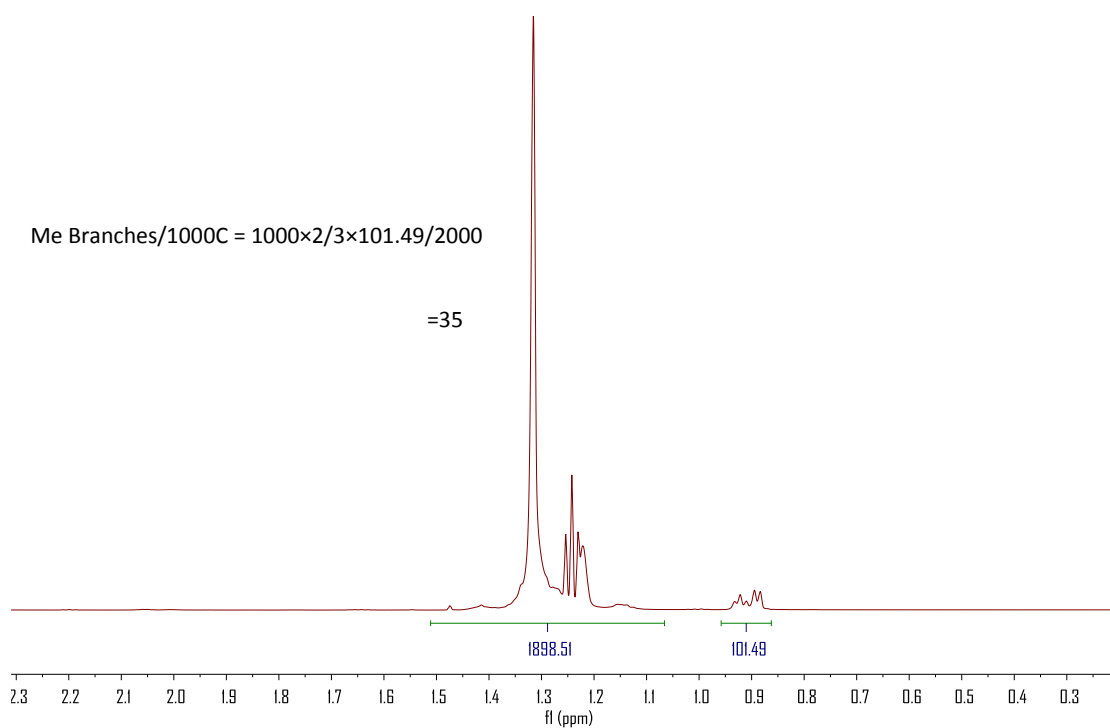

**Figure S17.**  $^1\text{H}$  NMR spectrum of the polymer from table 2, entry 1 ( $\text{C}_2\text{D}_2\text{Cl}_4$ ,  $120^\circ\text{C}$ )

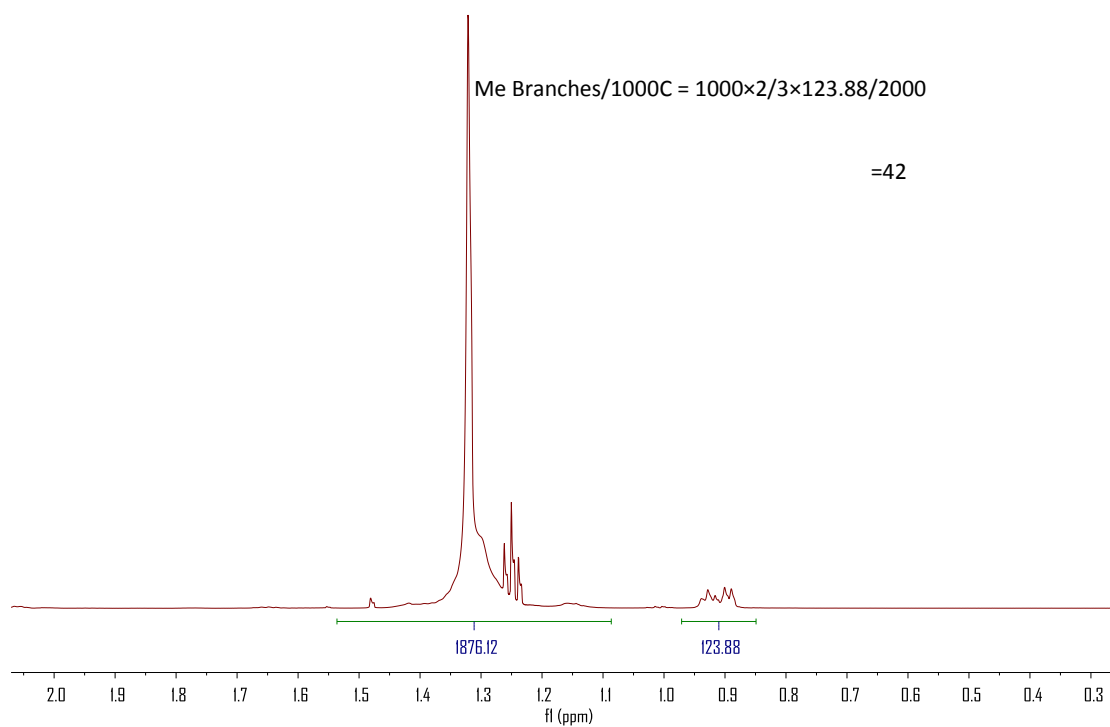

**Figure S18.**  $^1\text{H}$  NMR spectrum of the polymer from table 2, entry 2 ( $\text{C}_2\text{D}_2\text{Cl}_4$ ,  $120^\circ\text{C}$ )

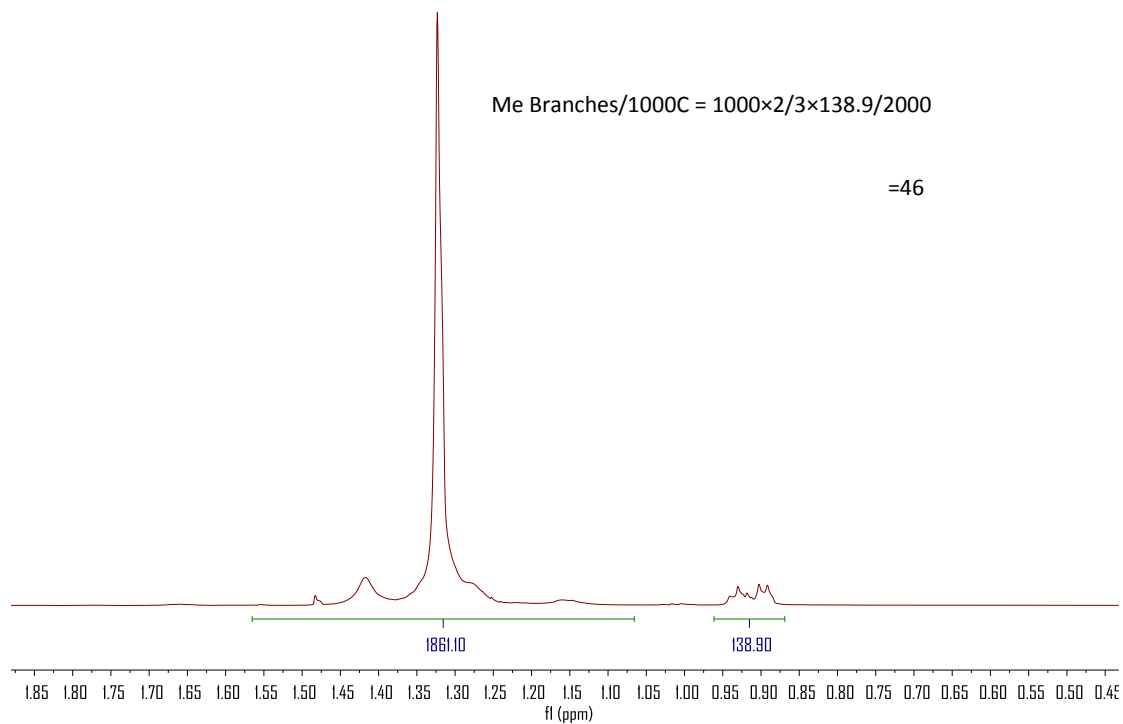

**Figure S19.**  $^1\text{H}$  NMR spectrum of the polymer from table 2, entry 4 ( $\text{C}_2\text{D}_2\text{Cl}_4$ ,  $120^\circ\text{C}$ )

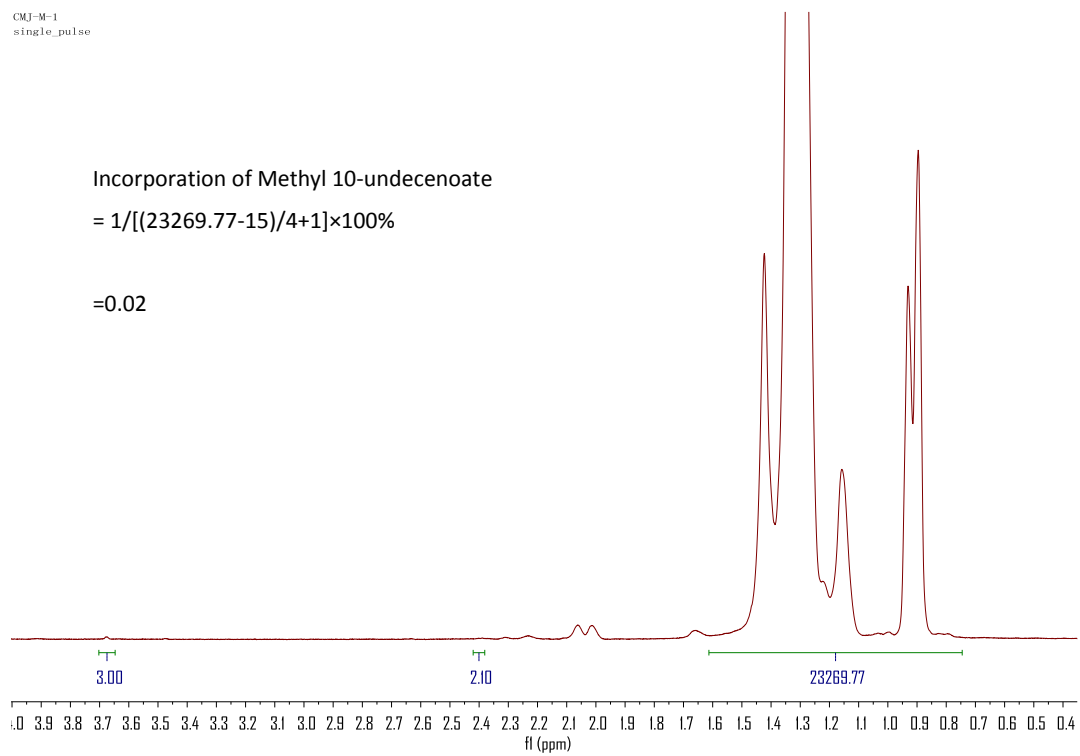

**Figure S20.**  $^1\text{H}$  NMR spectrum of the polymer from table 3, entry 1 ( $\text{C}_2\text{D}_2\text{Cl}_4$ ,  $120^\circ\text{C}$ )

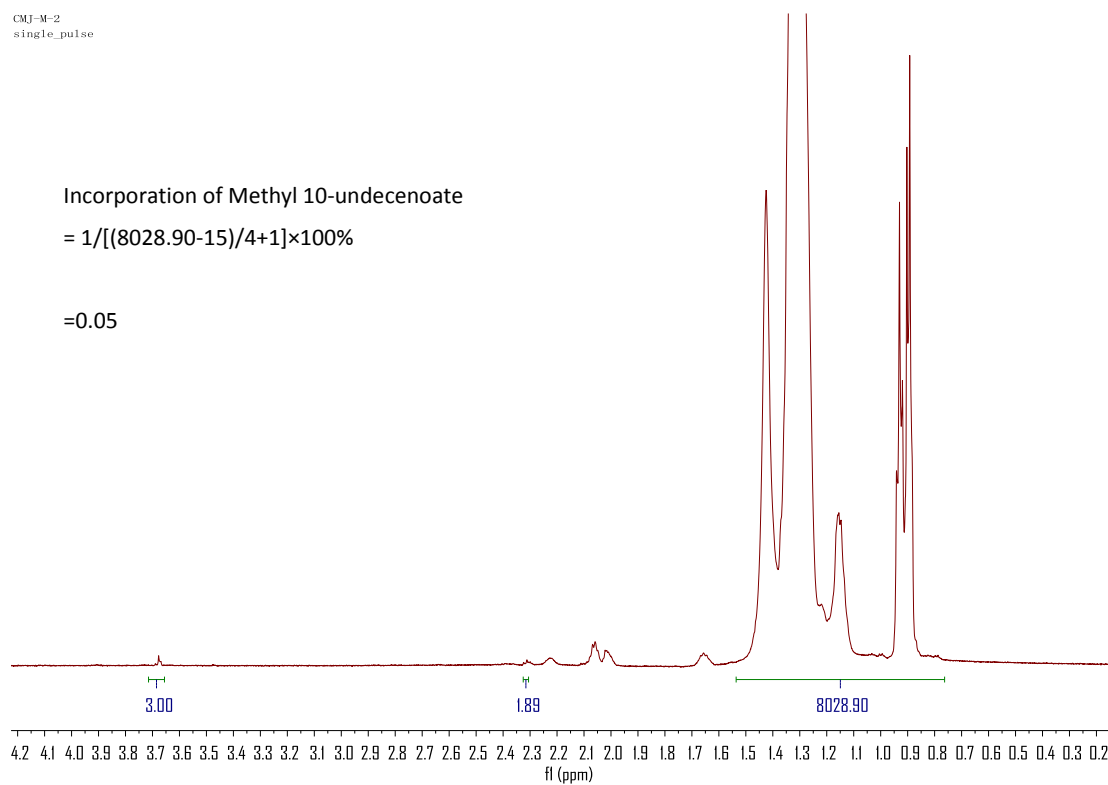

**Figure S21.**  $^1\text{H}$  NMR spectrum of the polymer from table 3, entry 2 ( $\text{C}_2\text{D}_2\text{Cl}_4$ ,  $120^\circ\text{C}$ )

Incorporation of Methyl 10-undecenoate  
 $= 1/[(5144.9-15)/4+1]\times 100\%$   
  
 $= 0.08$

CMJ-M-3  
single\_pulse

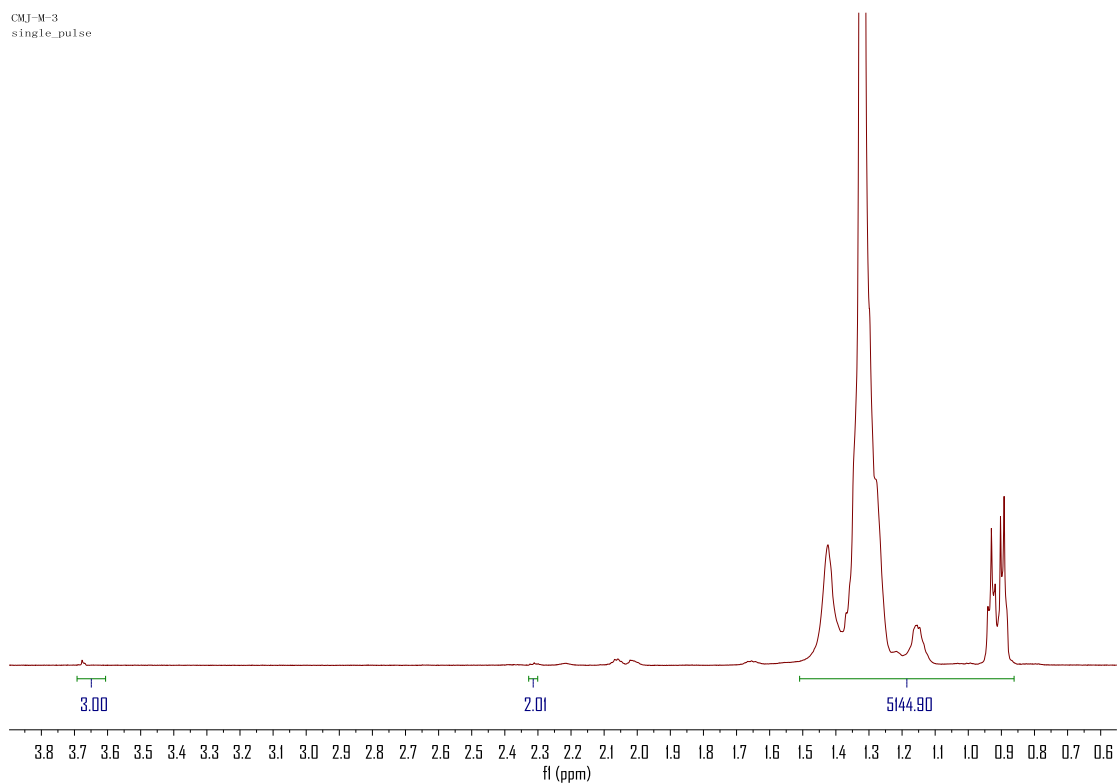

**Figure S22.**  $^1\text{H}$  NMR spectrum of the polymer from table 3, entry 3 ( $\text{C}_2\text{D}_2\text{Cl}_4$ ,  $120^\circ\text{C}$ )

### 2.5 DSC of polymer.

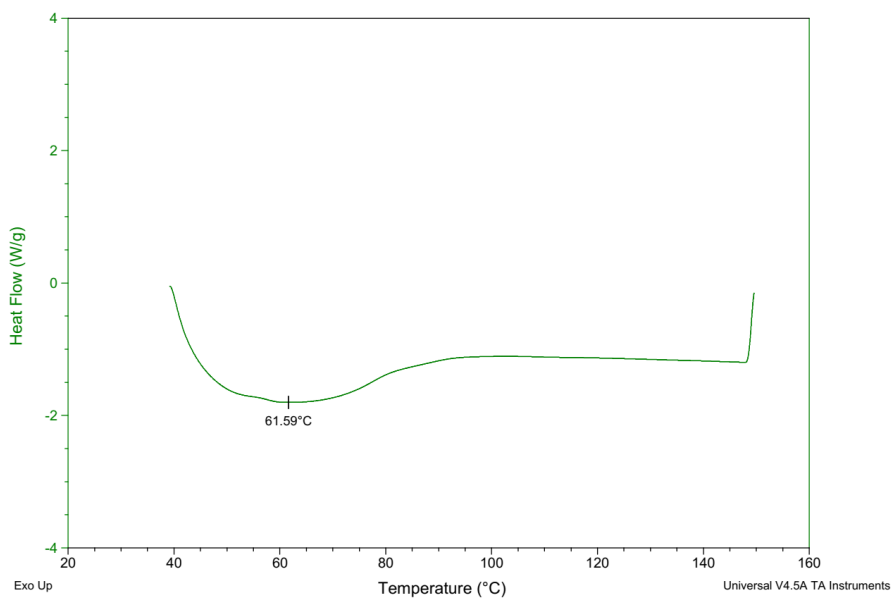

**Figure S23.** DSC of the polymer from table 1, entry 1

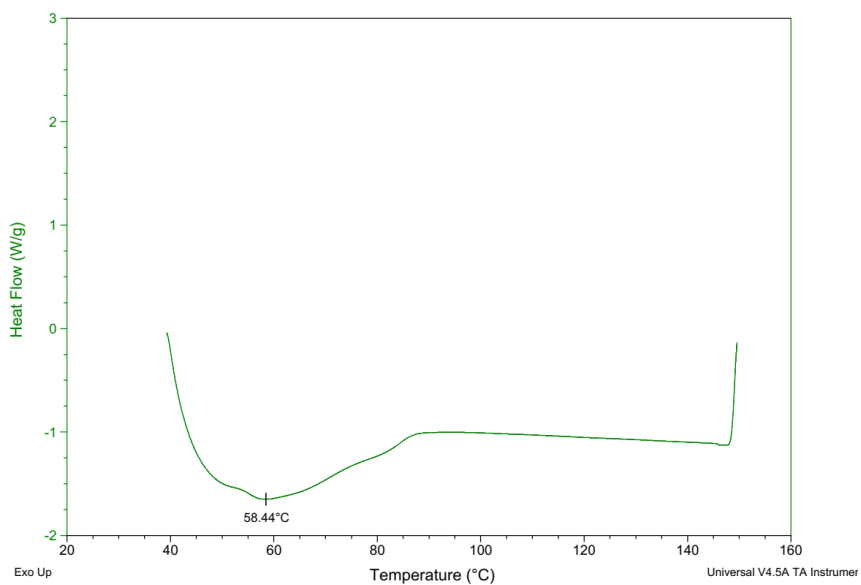

**Figure S24.** DSC of the polymer table 1, entry 2

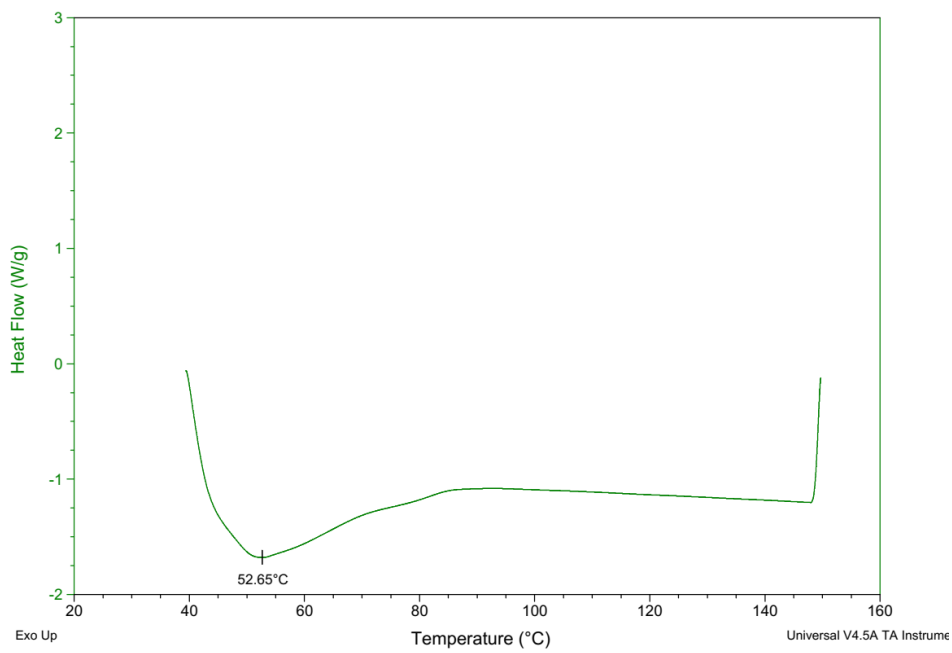

**Figure S25.** DSC of the polymer table 1, entry 3

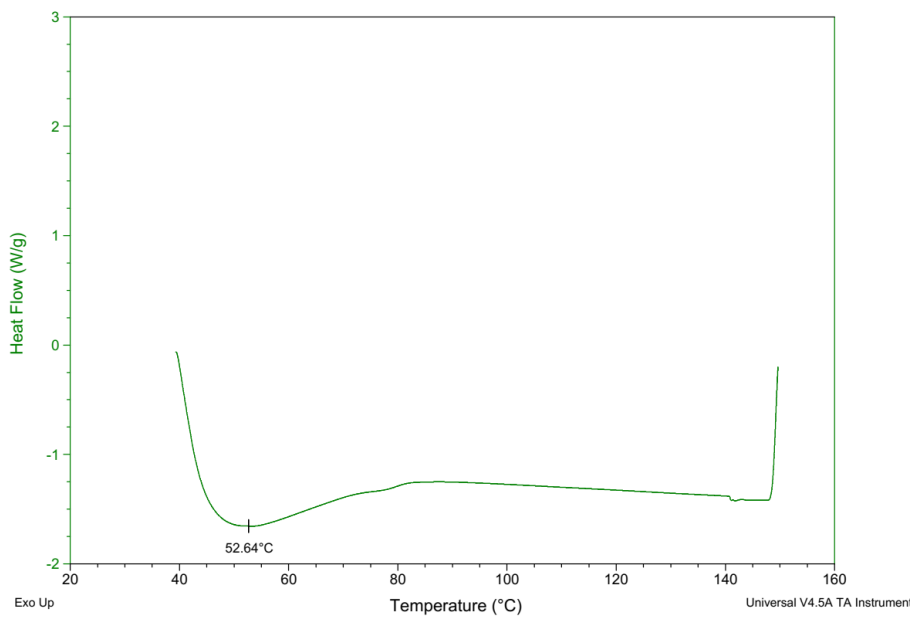

**Figure S26.** DSC of the polymer table 1, entry 4

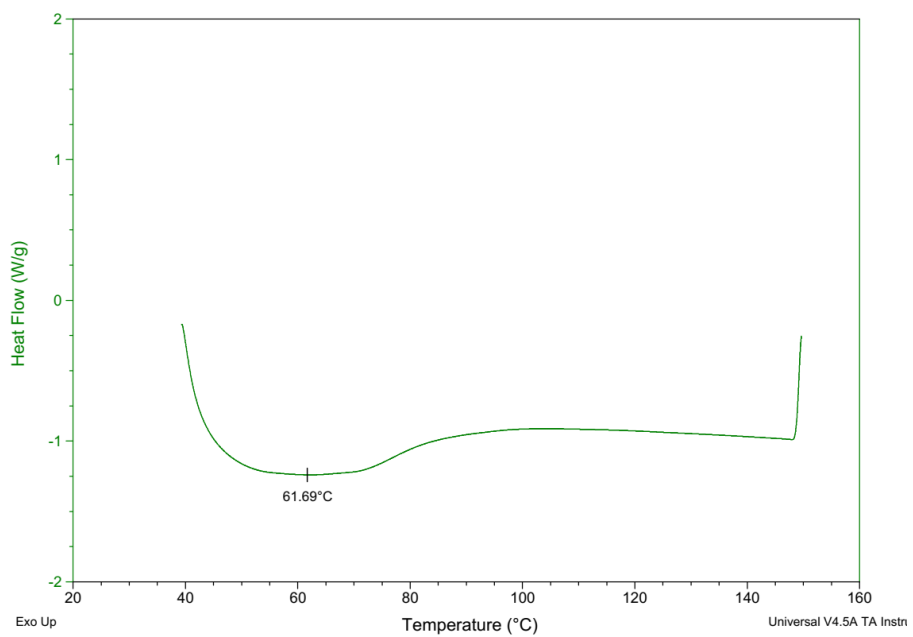

**Figure S27.** DSC of the polymer table 1, entry 5



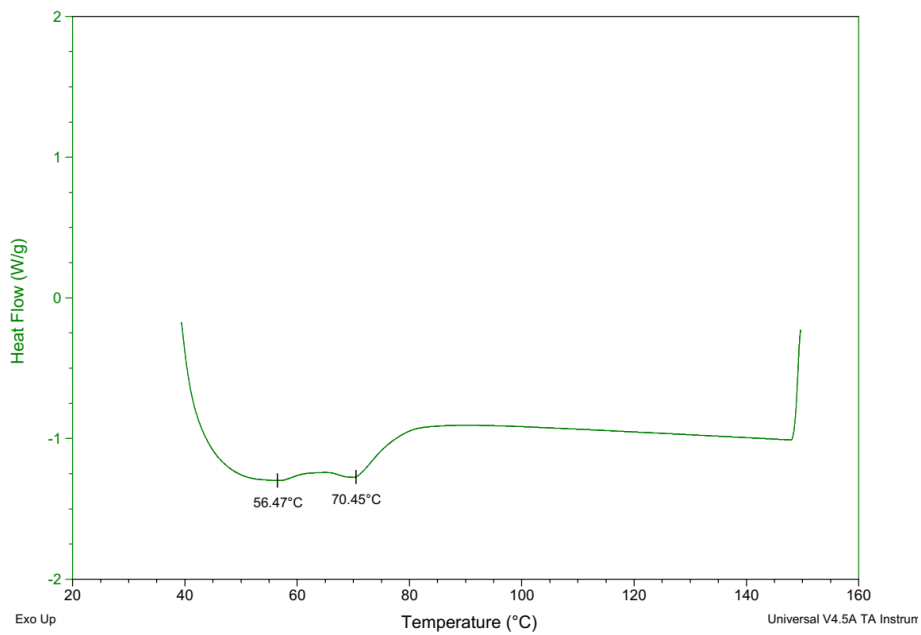

**Figure S28.** DSC of the polymer table 1, entry 6

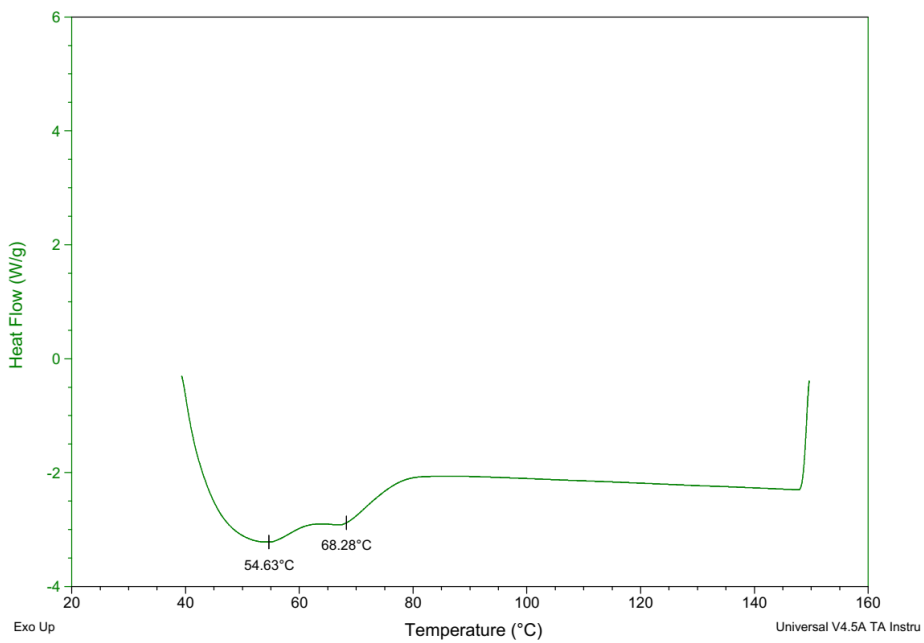

**Figure S29.** DSC of the polymer table 1, entry 7

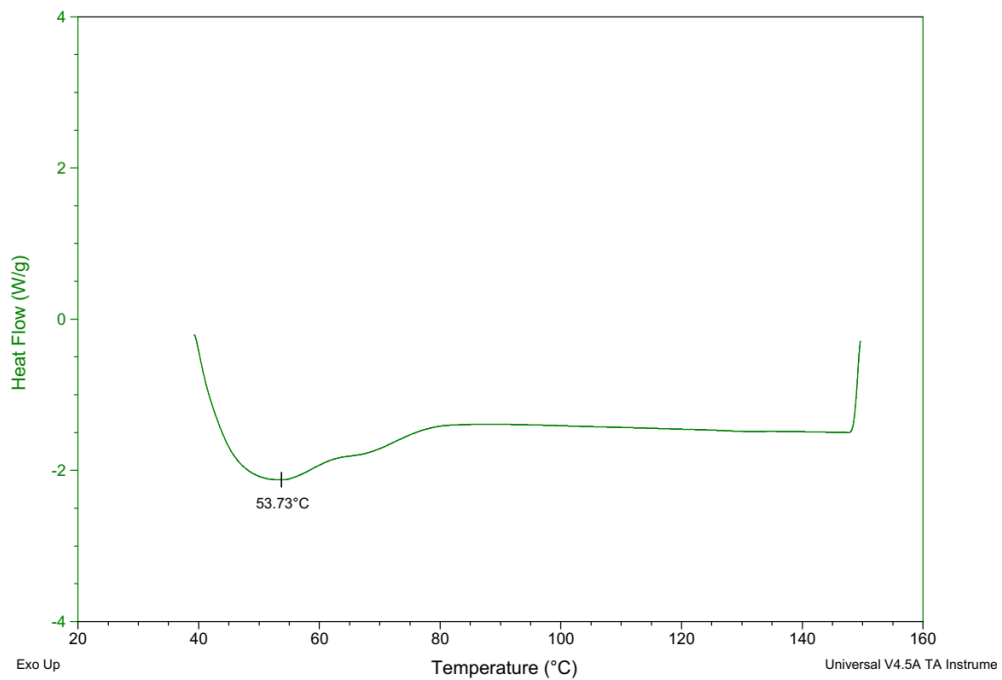

**Figure S30.** DSC of the polymer table 1, entry 8

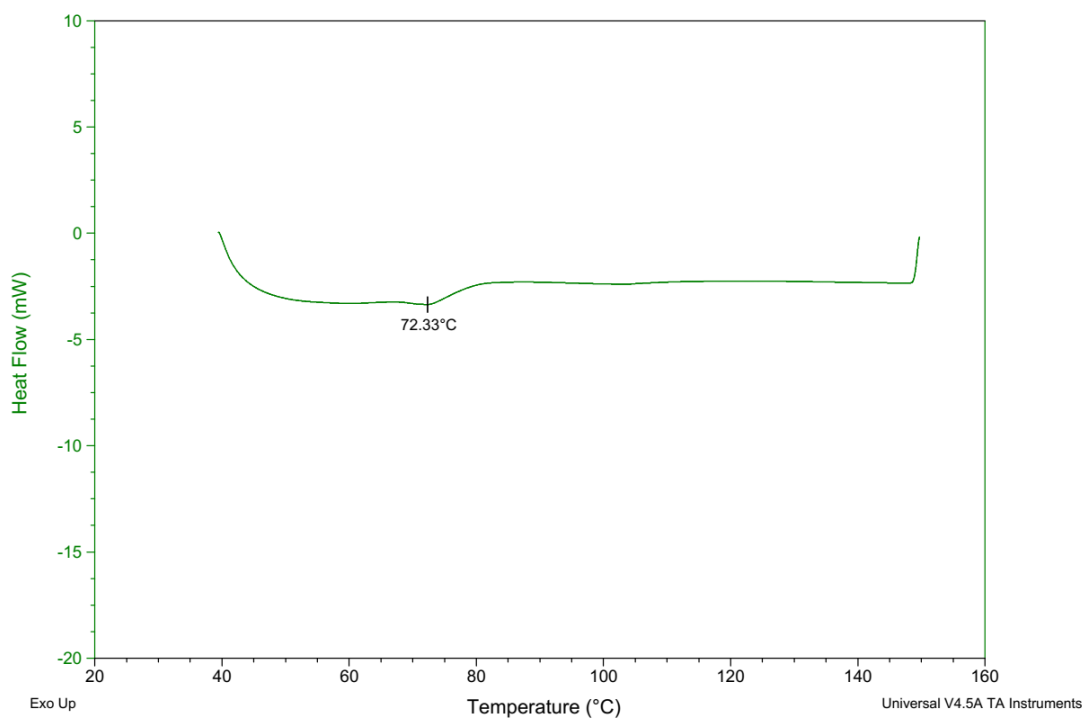

**Figure S31.** DSC of the polymer table 2, entry 1

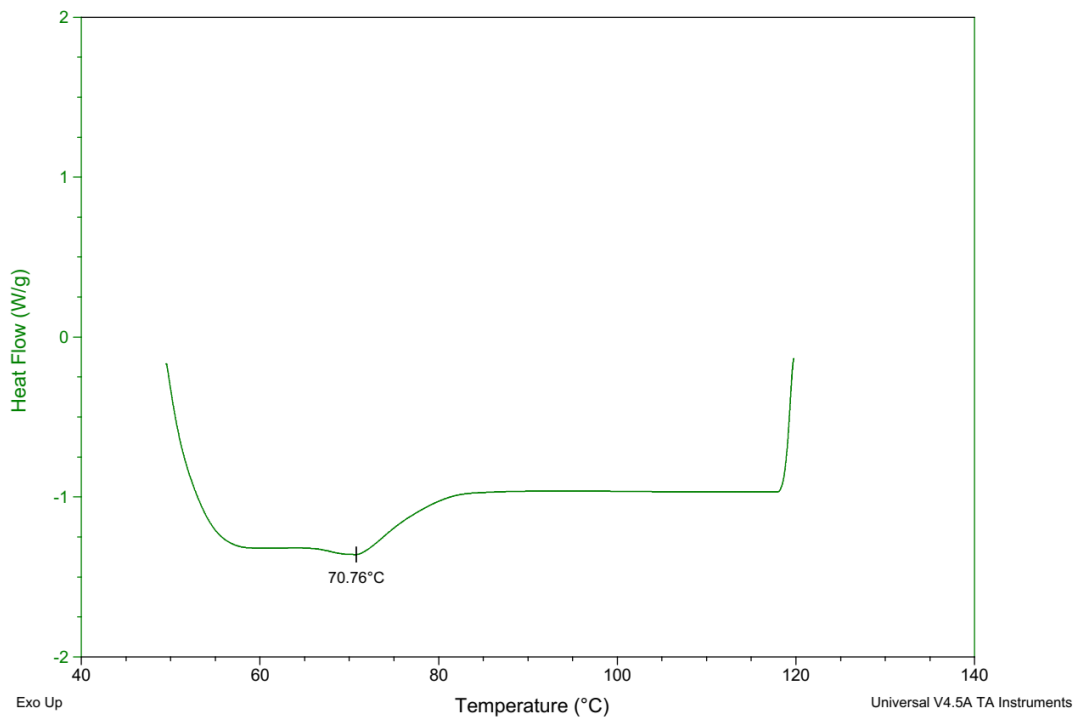

**Figure S32.** DSC of the polymer table 2, entry 2

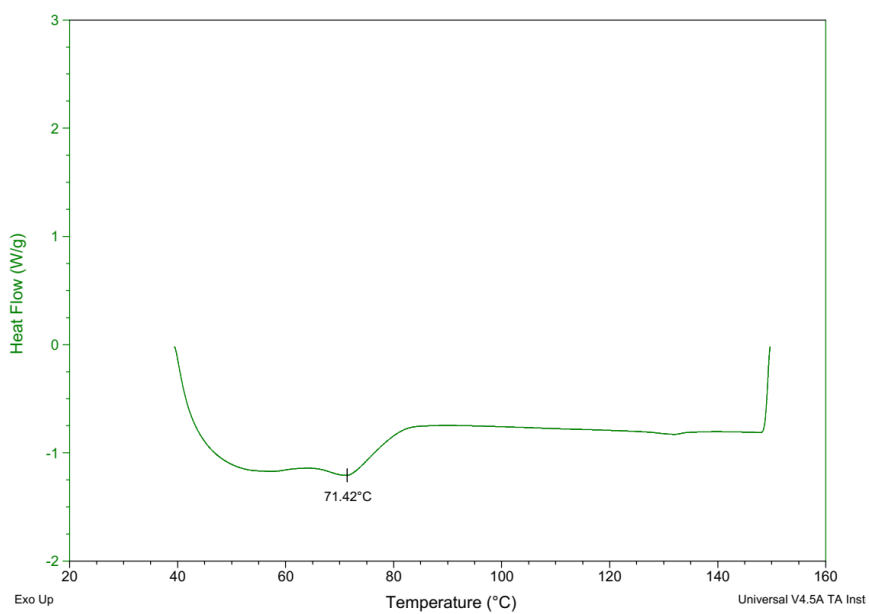

**Figure S33.** DSC of the polymer table 2, entry 3

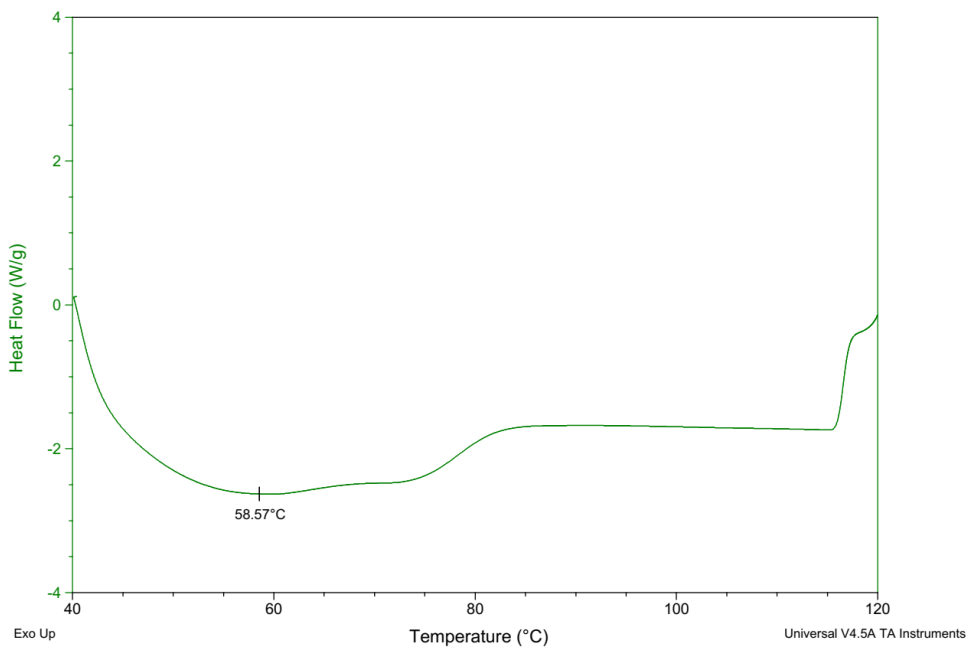

**Figure S34.** DSC of the Copolymer table 3, entry 1

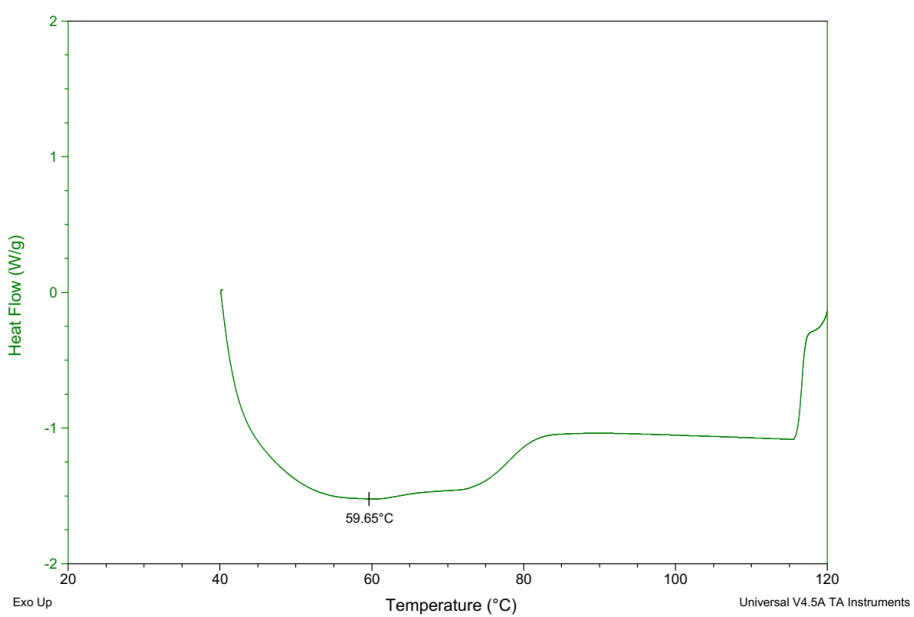

**Figure S35.** DSC of the Copolymer table 3, entry 2

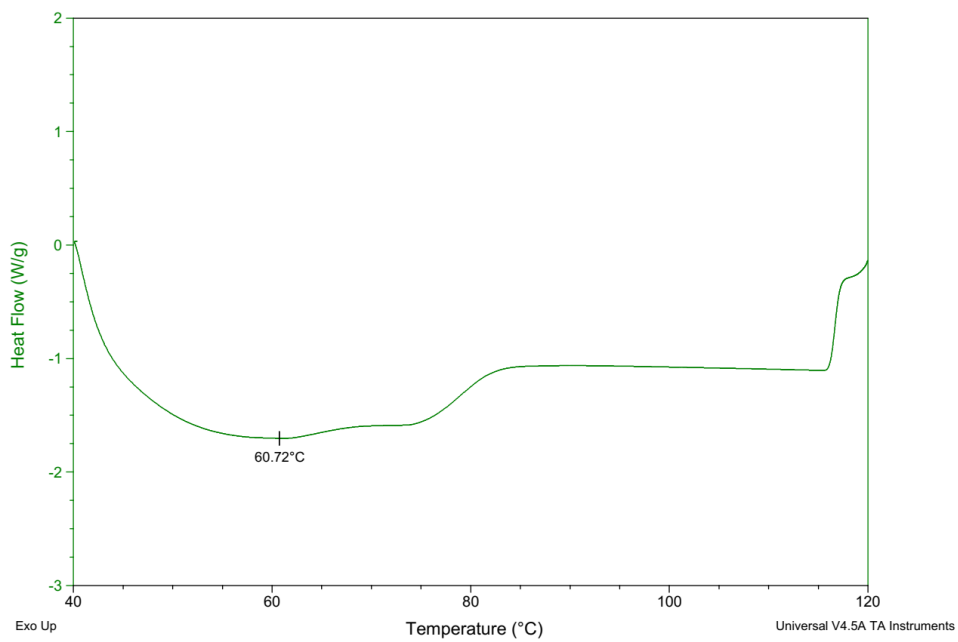

**Figure S36.** DSC of the Copolymer table 3, entry 3

## 2.6 GPC of polymer.

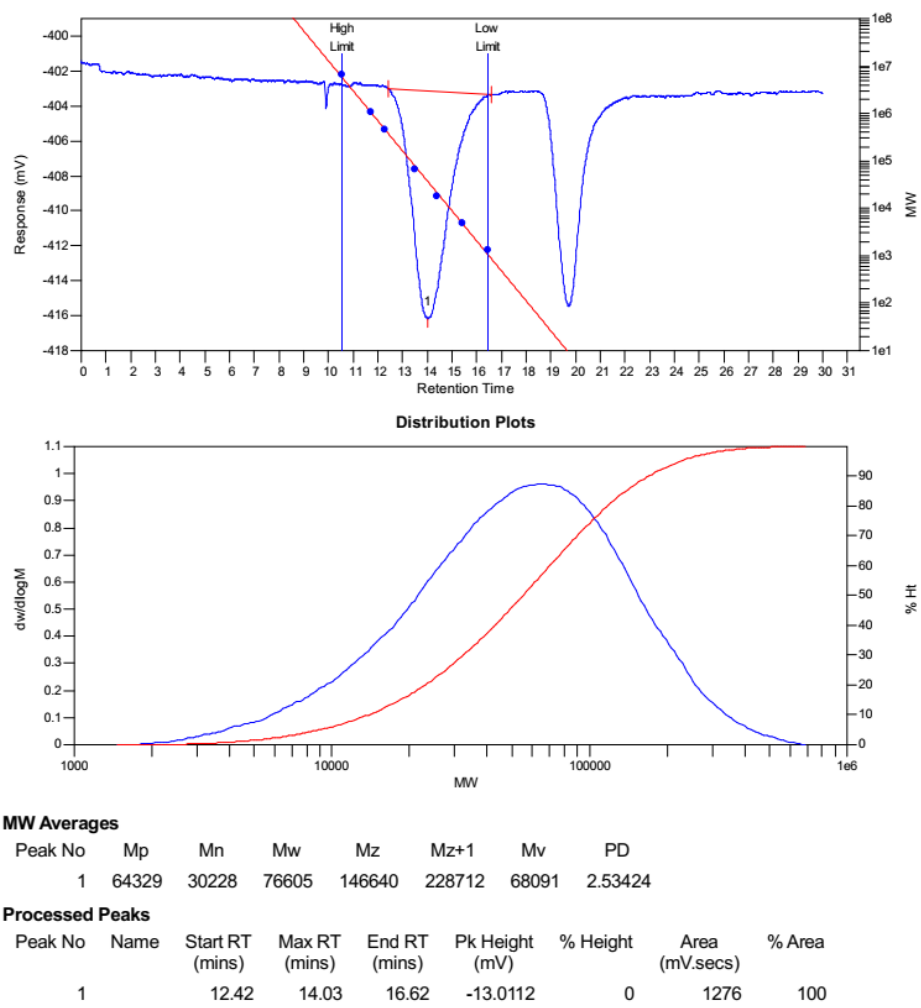

**Figure S37.** GPC of the polymer table 1, entry 1

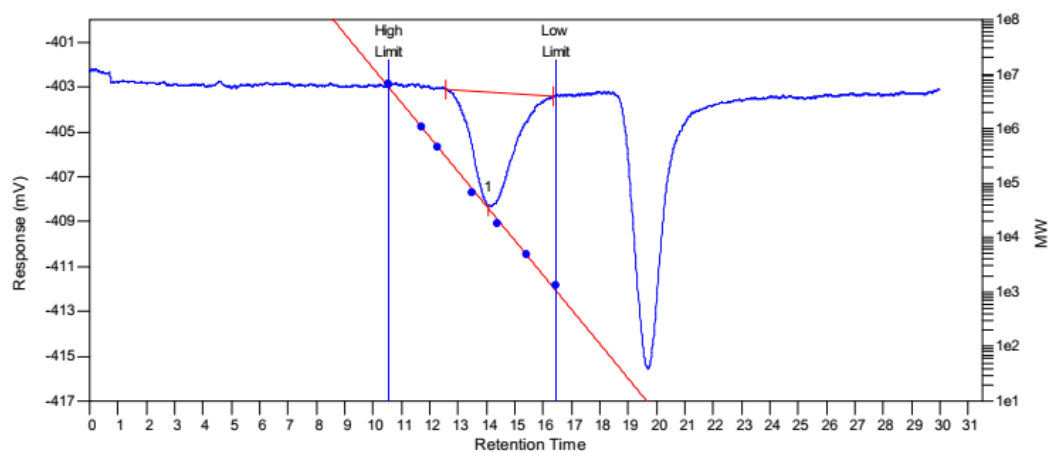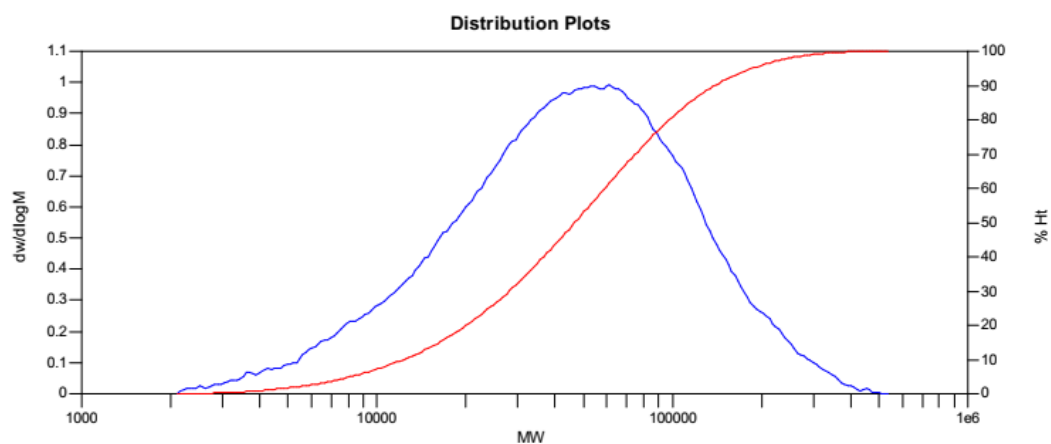

**MW Averages**

| Peak No | Mp    | Mn    | Mw    | Mz     | Mz+1   | Mv    | PD      |
|---------|-------|-------|-------|--------|--------|-------|---------|
| 1       | 61263 | 26935 | 63972 | 118818 | 180889 | 57195 | 2.37505 |

**Processed Peaks**

| Peak No | Name | Start RT (mins) | Max RT (mins) | End RT (mins) | Pk Height (mV) | % Height | Area (mV.secs) | % Area |
|---------|------|-----------------|---------------|---------------|----------------|----------|----------------|--------|
| 1       |      | 12.58           | 14.07         | 16.37         | -5.09971       | 0        | 484.901        | 100    |

**Figure S38.** GPC of the polymer table 1, entry 2

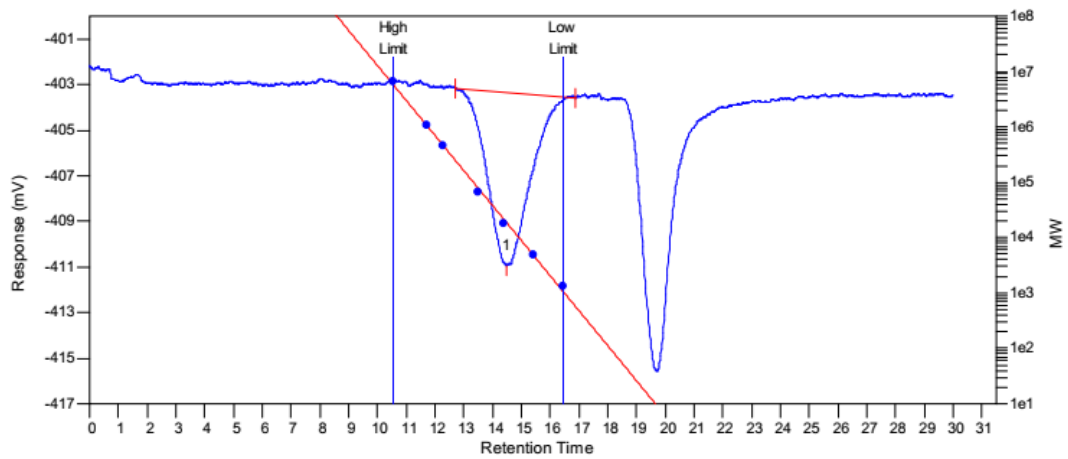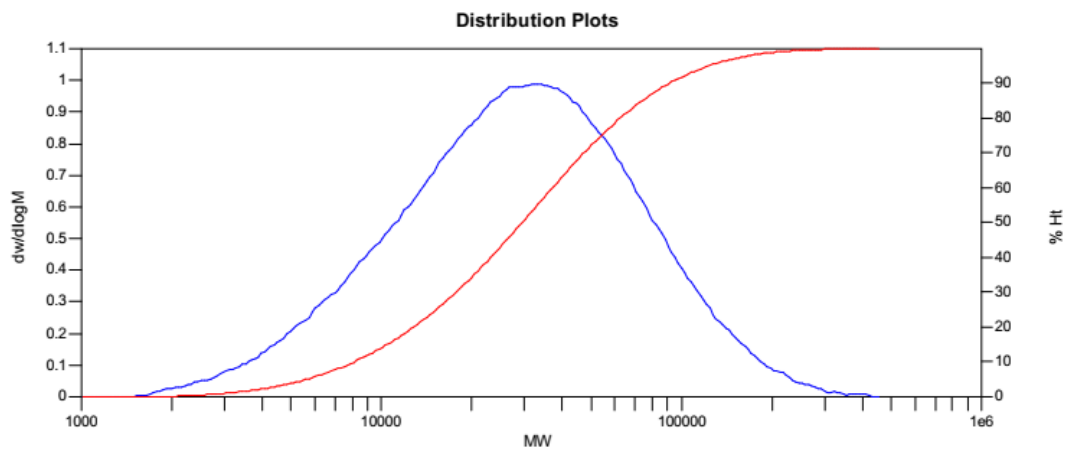

**MW Averages**

| Peak No | Mp    | Mn    | Mw    | Mz    | Mz+1   | Mv    | PD      |
|---------|-------|-------|-------|-------|--------|-------|---------|
| 1       | 33274 | 17795 | 41520 | 81891 | 135309 | 36902 | 2.33324 |

**Processed Peaks**

| Peak No | Name | Start RT (mins) | Max RT (mins) | End RT (mins) | Pk Height (mV) | % Height | Area (mV.secs) | % Area |
|---------|------|-----------------|---------------|---------------|----------------|----------|----------------|--------|
| 1       |      | 12.70           | 14.48         | 16.87         | -7.5994        | 0        | 724.097        | 100    |

**Figure S39.** GPC of the polymer table 1, entry 3



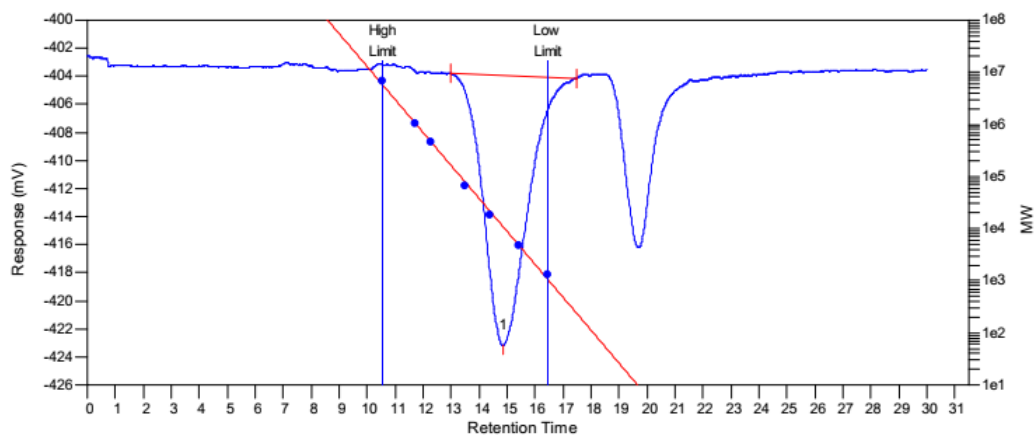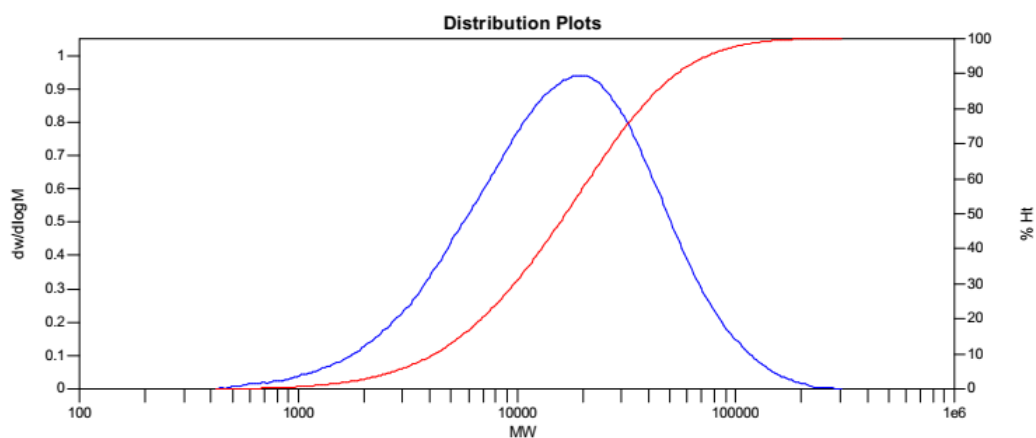

**MW Averages**

| Peak No | Mp    | Mn   | Mw    | Mz    | Mz+1  | Mv    | PD      |
|---------|-------|------|-------|-------|-------|-------|---------|
| 1       | 19446 | 9028 | 24259 | 50210 | 84240 | 21327 | 2.68708 |

**Processed Peaks**

| Peak No | Name | Start RT (mins) | Max RT (mins) | End RT (mins) | Pk Height (mV) | % Height | Area (mV.secs) | % Area |
|---------|------|-----------------|---------------|---------------|----------------|----------|----------------|--------|
| 1       |      | 12.97           | 14.85         | 17.47         | -19.2169       | 0        | 1927.59        | 100    |

**Figure S40.** GPC of the polymer table 1, entry 4

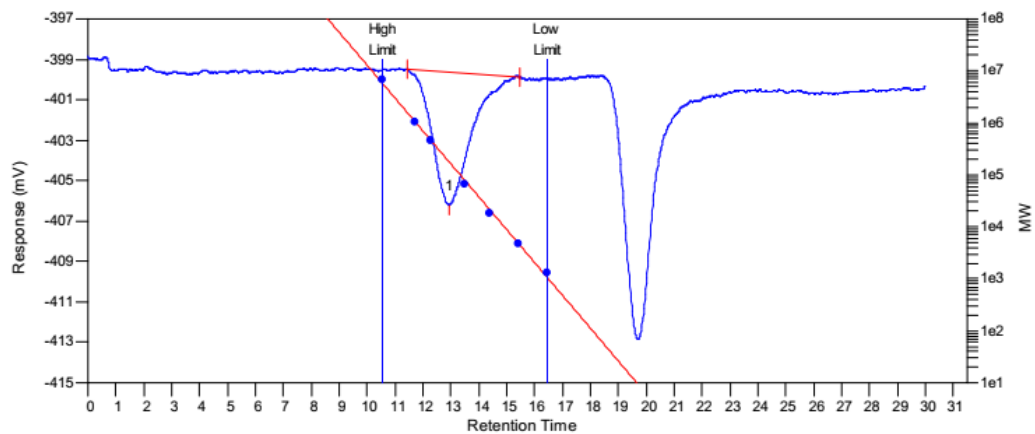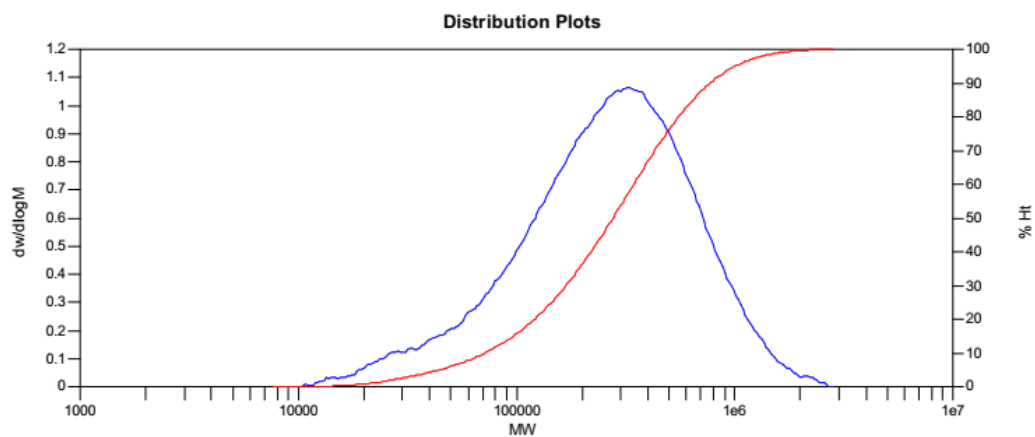

**MW Averages**

| Peak No | Mp     | Mn     | Mw     | Mz     | Mz+1   | Mv     | PD     |
|---------|--------|--------|--------|--------|--------|--------|--------|
| 1       | 330251 | 152576 | 363009 | 647222 | 973629 | 326849 | 2.3792 |

**Processed Peaks**

| Peak No | Name | Start RT (mins) | Max RT (mins) | End RT (mins) | Pk Height (mV) | % Height | Area (mV.secs) | % Area |
|---------|------|-----------------|---------------|---------------|----------------|----------|----------------|--------|
| 1       |      | 11.45           | 12.92         | 15.48         | -6.5435        | 0        | 580.646        | 100    |

**Figure S41.** GPC of the polymer table 1, entry 5

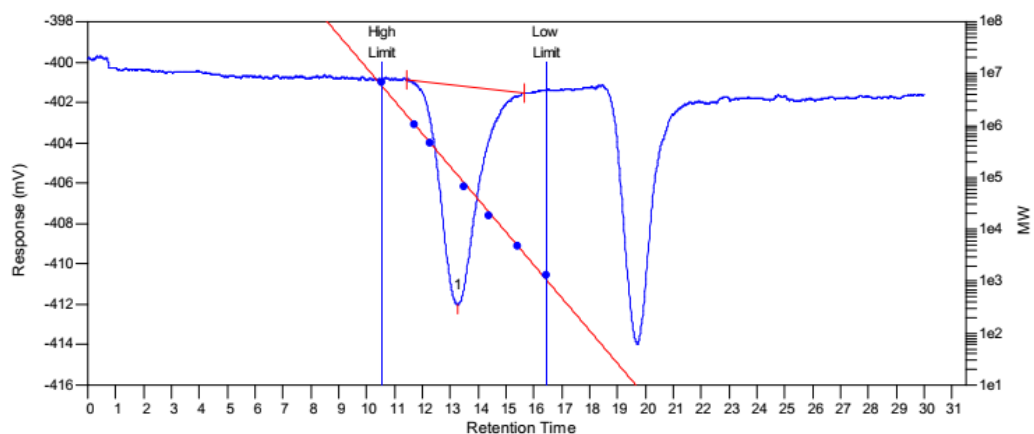

Distribution Plots

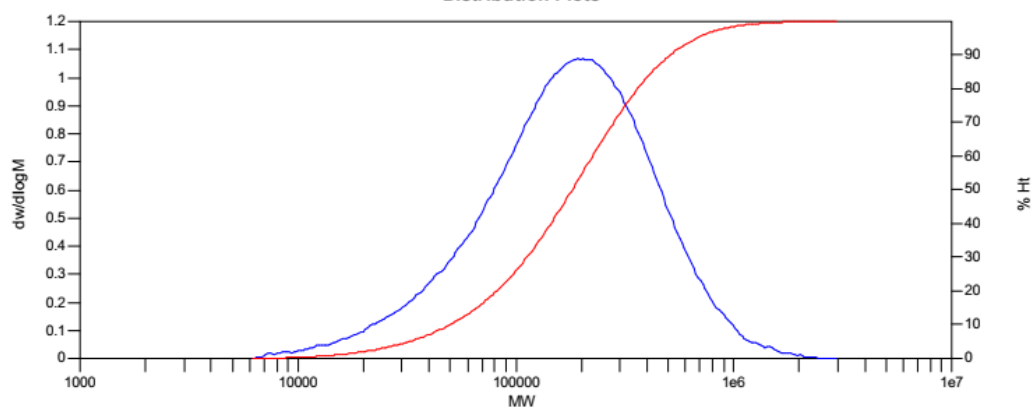

**MW Averages**

| Peak No | Mp     | Mn     | Mw     | Mz     | Mz+1   | Mv     | PD      |
|---------|--------|--------|--------|--------|--------|--------|---------|
| 1       | 202663 | 104290 | 241816 | 448724 | 730771 | 217287 | 2.31869 |

**Processed Peaks**

| Peak No | Name | Start RT (mins) | Max RT (mins) | End RT (mins) | Pk Height (mV) | % Height | Area (mV.secs) | % Area |
|---------|------|-----------------|---------------|---------------|----------------|----------|----------------|--------|
| 1       |      | 11.42           | 13.28         | 15.63         | -10.8392       | 0        | 958.602        | 100    |

**Figure S42.** GPC of the polymer table 1, entry 6

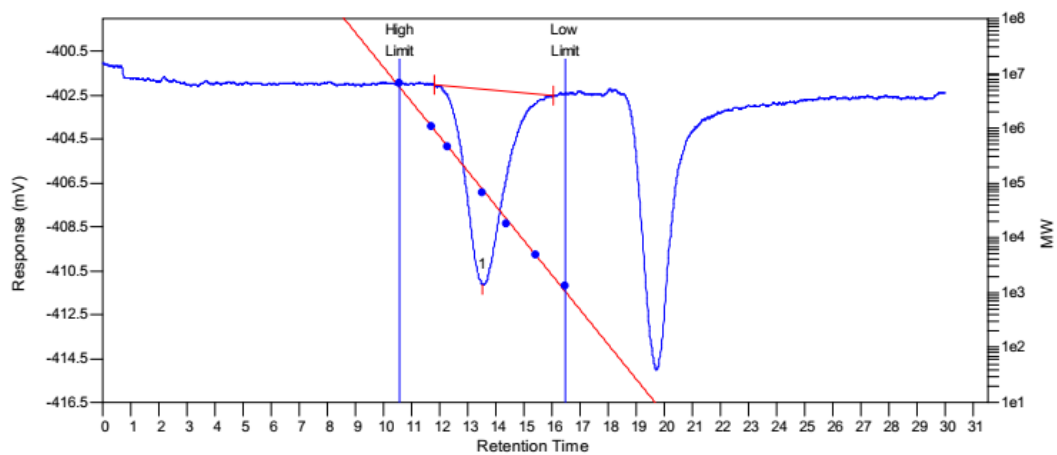

Distribution Plots

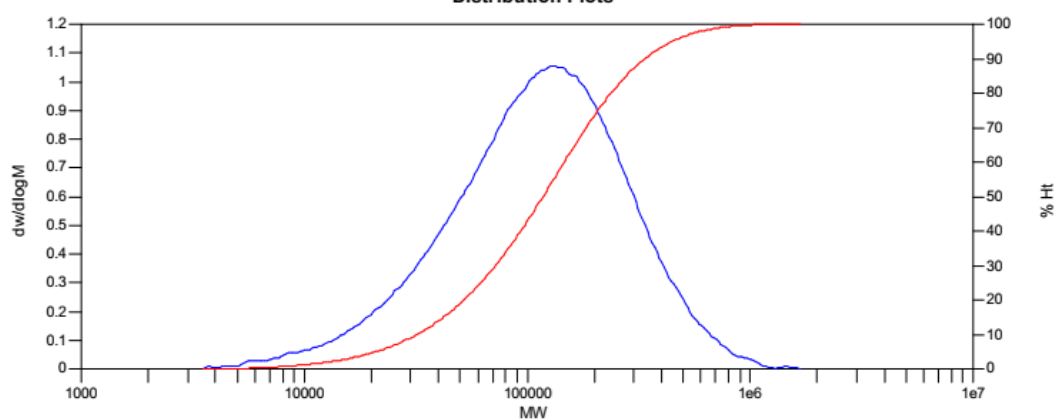

**MW Averages**

| Peak No | Mp     | Mn    | Mw     | Mz     | Mz+1   | Mv     | PD      |
|---------|--------|-------|--------|--------|--------|--------|---------|
| 1       | 133818 | 66949 | 158138 | 294165 | 471517 | 141834 | 2.36207 |

**Processed Peaks**

| Peak No | Name | Start RT (mins) | Max RT (mins) | End RT (mins) | Pk Height (mV) | % Height | Area (mV.secs) | % Area |
|---------|------|-----------------|---------------|---------------|----------------|----------|----------------|--------|
| 1       |      | 11.80           | 13.53         | 16.02         | -8.90883       | 0        | 798.235        | 100    |

**Figure S43.** GPC of the polymer table 1, entry 7

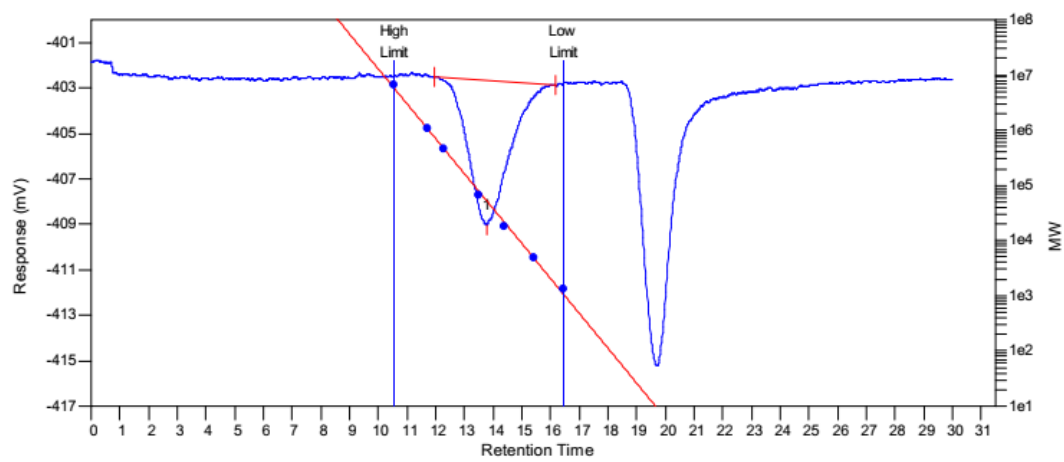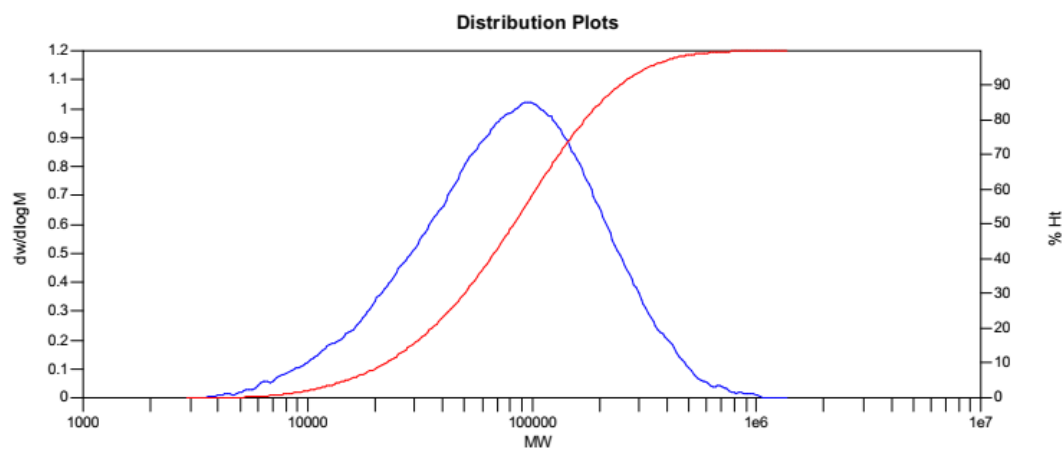

**MW Averages**

| Peak No | Mp    | Mn    | Mw     | Mz     | Mz+1   | Mv     | PD      |
|---------|-------|-------|--------|--------|--------|--------|---------|
| 1       | 92781 | 48580 | 113468 | 215090 | 344524 | 101379 | 2.33569 |

**Processed Peaks**

| Peak No | Name | Start RT (mins) | Max RT (mins) | End RT (mins) | Pk Height (mV) | % Height | Area (mV.secs) | % Area |
|---------|------|-----------------|---------------|---------------|----------------|----------|----------------|--------|
| 1       |      | 11.95           | 13.78         | 16.15         | -6.33366       | 0        | 584.365        | 100    |

**Figure S44.** GPC of the polymer table 1, entry 8

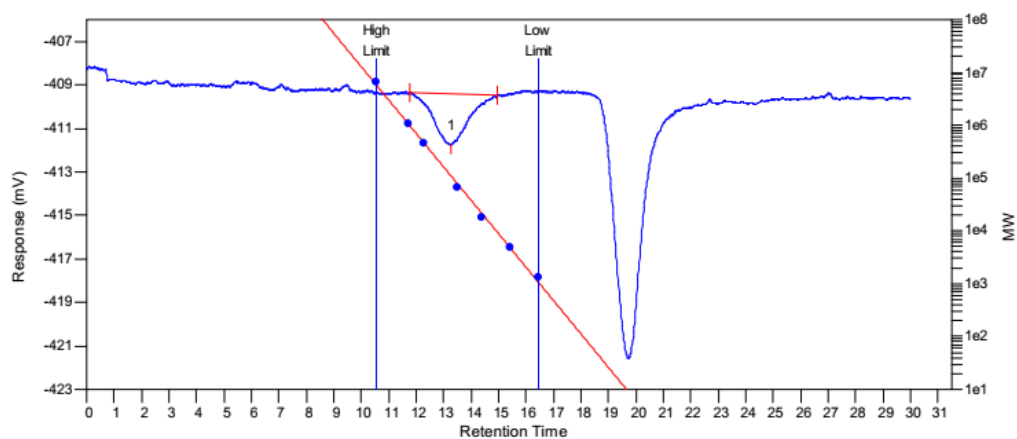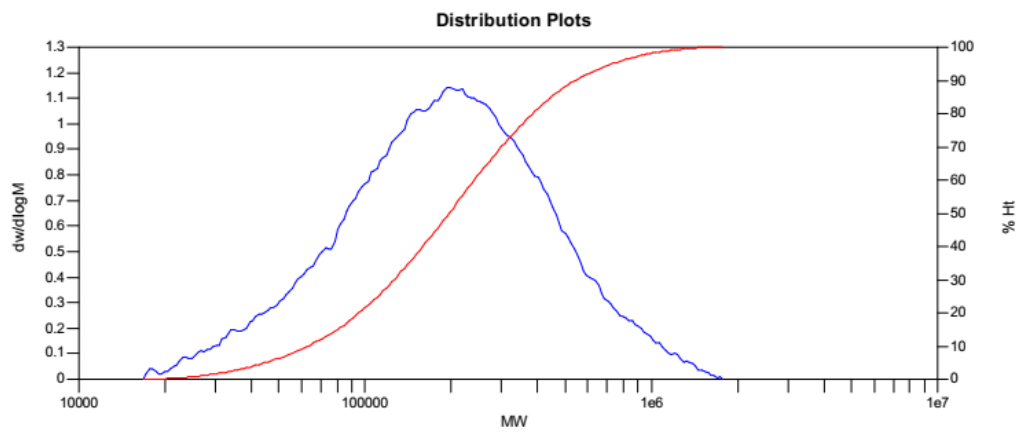

**MW Averages**

| Peak No | Mp     | Mn     | Mw     | Mz     | Mz+1   | Mv     | PD      |
|---------|--------|--------|--------|--------|--------|--------|---------|
| 1       | 197774 | 132714 | 260393 | 456280 | 688253 | 236505 | 1.96206 |

**Processed Peaks**

| Peak No | Name | Start RT (mins) | Max RT (mins) | End RT (mins) | Pk Height (mV) | % Height | Area (mV.secs) | % Area |
|---------|------|-----------------|---------------|---------------|----------------|----------|----------------|--------|
| 1       |      | 11.77           | 13.27         | 14.95         | -2.34408       | 0        | 193.345        | 100    |

**Figure S45.** GPC of the polymer table 2, entry 1

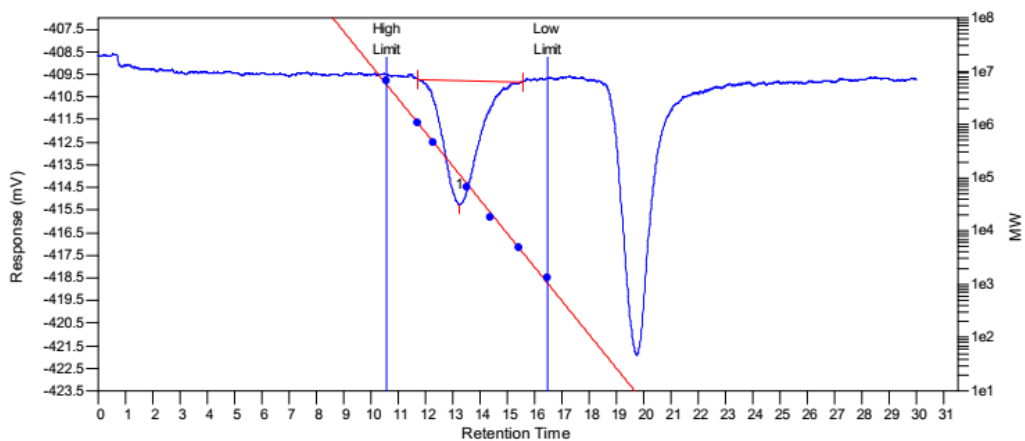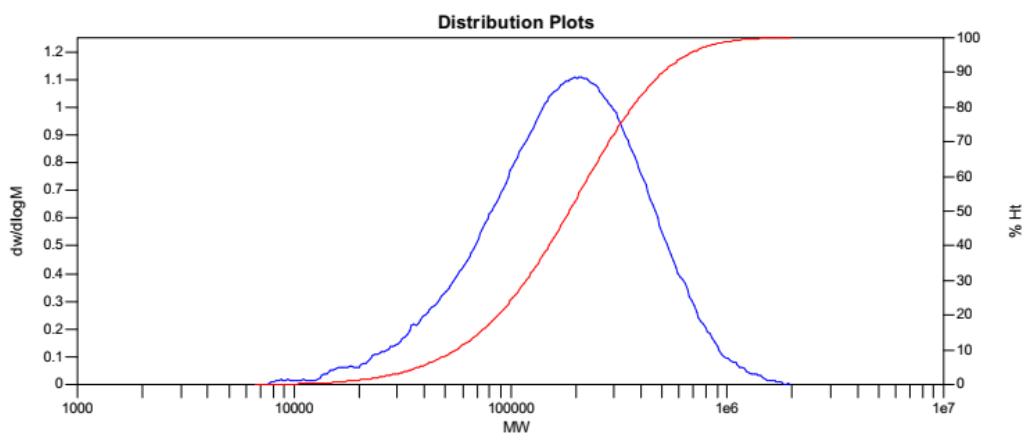

**MW Averages**

| Peak No | Mp     | Mn     | Mw     | Mz     | Mz+1   | Mv     | PD     |
|---------|--------|--------|--------|--------|--------|--------|--------|
| 1       | 207672 | 114908 | 241835 | 417222 | 627195 | 219746 | 2.1046 |

**Processed Peaks**

| Peak No | Name | Start RT (mins) | Max RT (mins) | End RT (mins) | Pk Height (mV) | % Height | Area (mV.secs) | % Area |
|---------|------|-----------------|---------------|---------------|----------------|----------|----------------|--------|
| 1       |      | 11.70           | 13.23         | 15.58         | -5.48456       | 0        | 467.208        | 100    |

**Figure S46.** GPC of the polymer table 2, entry 2

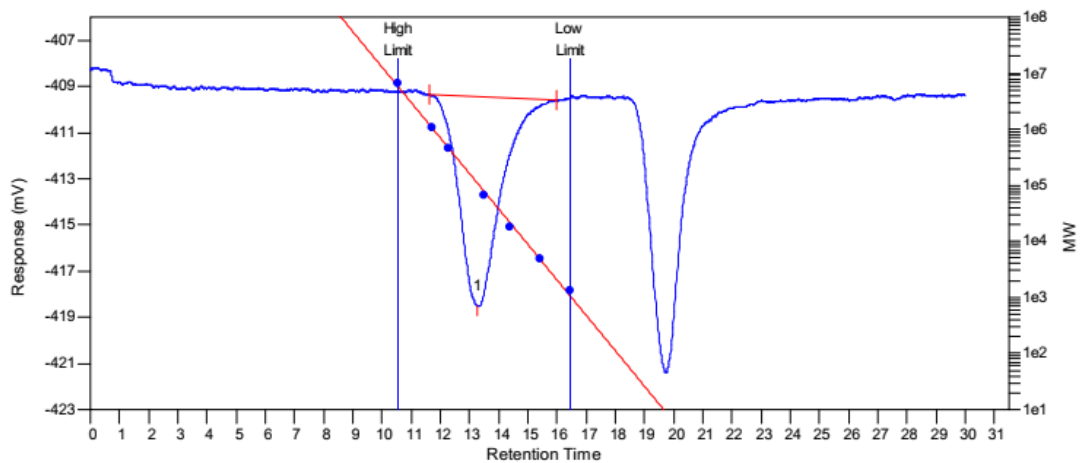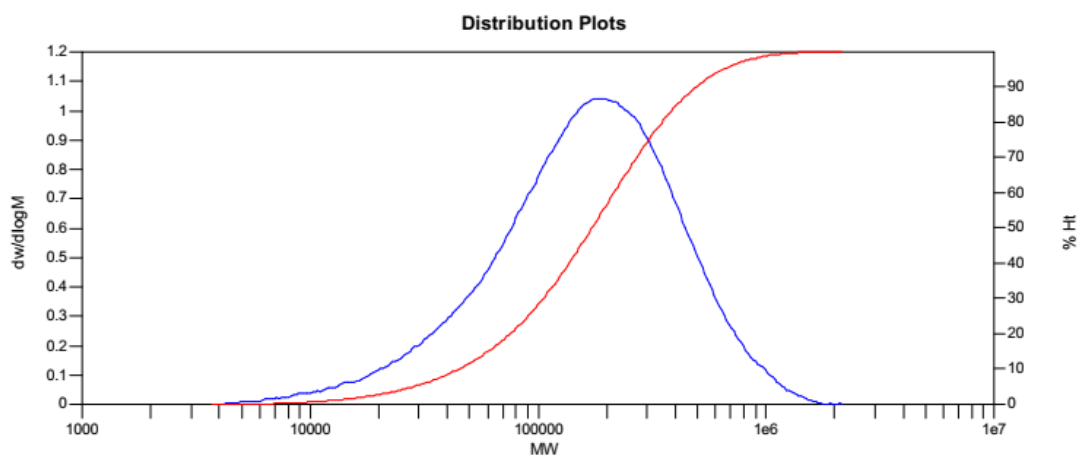

**MW Averages**

| Peak No | Mp     | Mn    | Mw     | Mz     | Mz+1   | Mv     | PD      |
|---------|--------|-------|--------|--------|--------|--------|---------|
| 1       | 193004 | 93343 | 229776 | 417840 | 636818 | 206249 | 2.46163 |

**Processed Peaks**

| Peak No | Name | Start RT (mins) | Max RT (mins) | End RT (mins) | Pk Height (mV) | % Height | Area (mV.secs) | % Area |
|---------|------|-----------------|---------------|---------------|----------------|----------|----------------|--------|
| 1       |      | 11.63           | 13.28         | 15.98         | -9.06945       | 0        | 821.784        | 100    |

**Figure S47.** GPC of the polymer table 2, entry 4



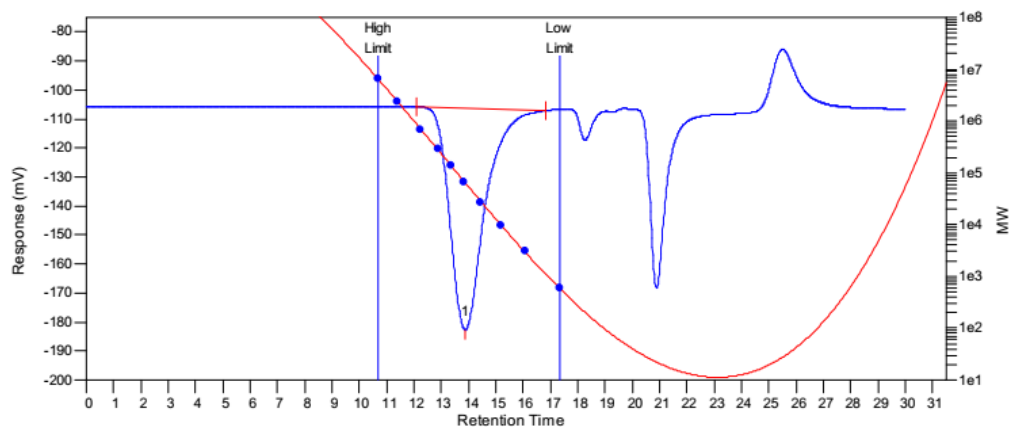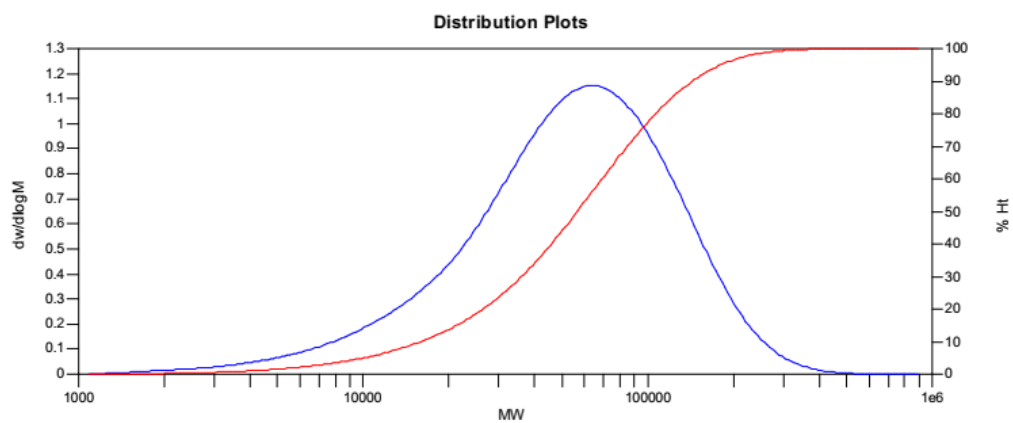

**MW Averages**

| Peak No | Mp    | Mn    | Mw    | Mz     | Mz+1   | Mv    | PD      |
|---------|-------|-------|-------|--------|--------|-------|---------|
| 1       | 63808 | 30646 | 69550 | 114386 | 164633 | 63707 | 2.26946 |

**Processed Peaks**

| Peak No | Name | Start RT (mins) | Max RT (mins) | End RT (mins) | Pk Height (mV) | % Height | Area (mV.secs) | % Area |
|---------|------|-----------------|---------------|---------------|----------------|----------|----------------|--------|
| 1       |      | 12.08           | 13.88         | 16.83         | -76.3366       | 0        | 6278.78        | 100    |

**Figure S48.** GPC of the copolymer table 3, entry 1

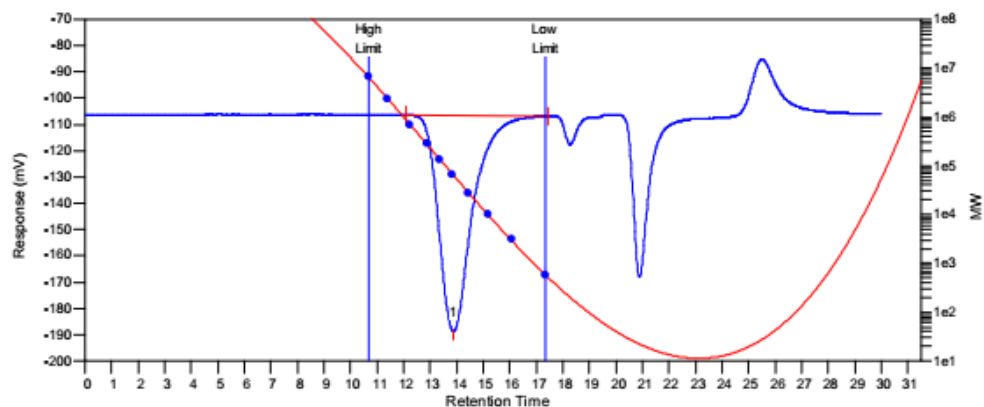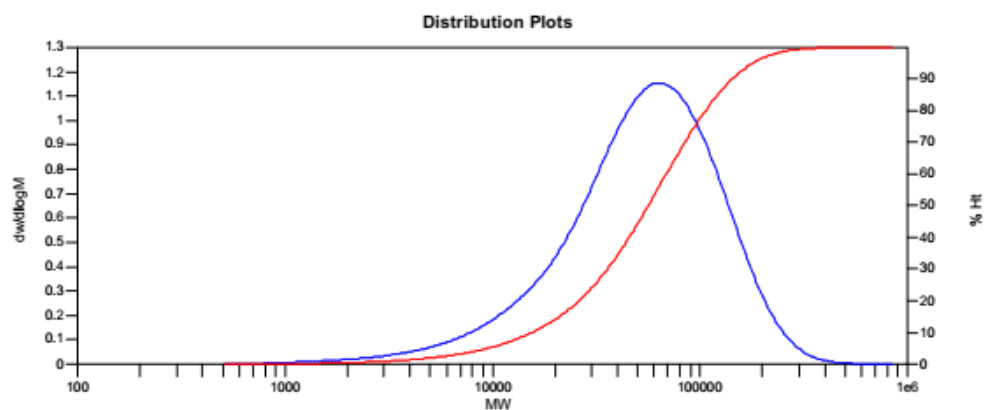

**MW Averages**

| Peak No | Mp    | Mn    | Mw    | Mz     | Mz+1   | Mv    | PD    |
|---------|-------|-------|-------|--------|--------|-------|-------|
| 1       | 63808 | 28240 | 68962 | 113713 | 164489 | 63106 | 2.442 |

**Processed Peaks**

| Peak No | Name | Start RT (mins) | Max RT (mins) | End RT (mins) | Pk Height (mV) | % Height | Area (mV.secs) | % Area |
|---------|------|-----------------|---------------|---------------|----------------|----------|----------------|--------|
| 1       |      | 12.12           | 13.88         | 17.45         | -82.1455       | 0        | 6744.97        | 100    |

**Figure S49.** GPC of the copolymer table 3, entry 2

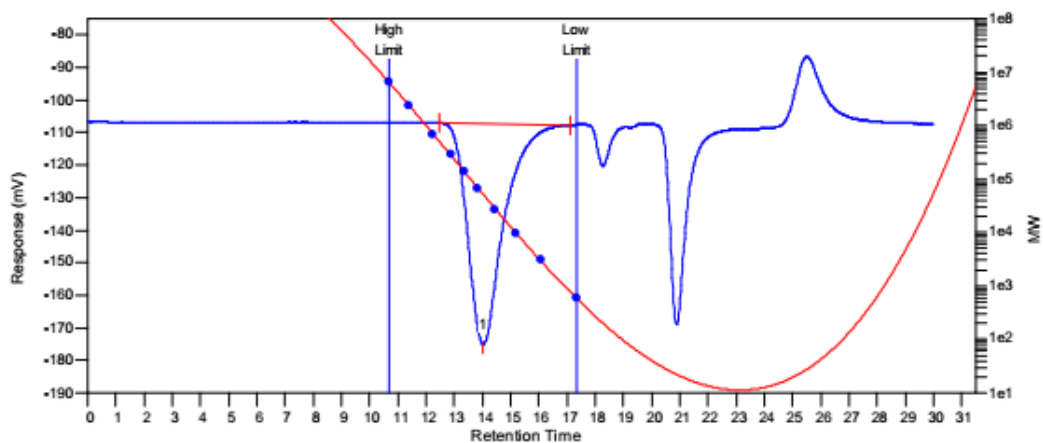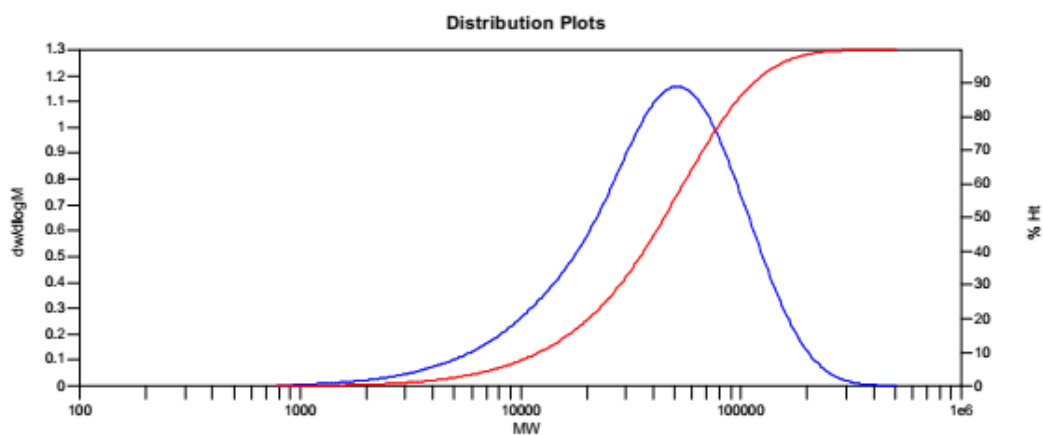

**MW Averages**

| Peak No | Mp    | Mn    | Mw    | Mz    | Mz+1   | Mv    | PD      |
|---------|-------|-------|-------|-------|--------|-------|---------|
| 1       | 52548 | 23702 | 54701 | 89997 | 128372 | 50056 | 2.30786 |

**Processed Peaks**

| Peak No | Name | Start RT (mins) | Max RT (mins) | End RT (mins) | Pk Height (mV) | % Height | Area (mV.secs) | % Area |
|---------|------|-----------------|---------------|---------------|----------------|----------|----------------|--------|
| 1       |      | 12.47           | 14.03         | 17.10         | -67.8691       | 0        | 5568.72        | 100    |

**Figure S50.** GPC of the copolymer table 3, entry 3

### 3. X-ray Crystallography

| Table S1 Crystal data and structure refinement for 0925CMJCH3CH3_0m. |                                                                                   |
|----------------------------------------------------------------------|-----------------------------------------------------------------------------------|
| Identification code                                                  | 0925CMJCH3CH3_0m                                                                  |
| Empirical formula                                                    | C <sub>46</sub> H <sub>41</sub> Br <sub>2</sub> Cl <sub>2</sub> N <sub>3</sub> Ni |
| Formula weight                                                       | 925.25                                                                            |
| Temperature/K                                                        | 170                                                                               |
| Crystal system                                                       | triclinic                                                                         |
| Space group                                                          | P-1                                                                               |
| a/Å                                                                  | 9.6967(5)                                                                         |
| b/Å                                                                  | 11.2561(7)                                                                        |
| c/Å                                                                  | 21.1250(12)                                                                       |
| α/°                                                                  | 76.356(2)                                                                         |
| β/°                                                                  | 77.471(2)                                                                         |
| γ/°                                                                  | 67.677(2)                                                                         |
| Volume/Å <sup>3</sup>                                                | 2051.8(2)                                                                         |
| Z                                                                    | 2                                                                                 |
| ρ <sub>calc</sub> /cm <sup>3</sup>                                   | 1.498                                                                             |
| μ/mm <sup>-1</sup>                                                   | 2.587                                                                             |
| F(000)                                                               | 940                                                                               |
| Crystal size/mm <sup>3</sup>                                         | 0.15 × 0.08 × 0.05                                                                |
| Radiation                                                            | MoKα (λ = 0.71073)                                                                |

|                                               |                                                                        |
|-----------------------------------------------|------------------------------------------------------------------------|
| 2 $\Theta$ range for data collection/°        | 3.97 to 53.016                                                         |
| Index ranges                                  | -12 $\leq$ h $\leq$ 12, -14 $\leq$ k $\leq$ 14, -26 $\leq$ l $\leq$ 26 |
| Reflections collected                         | 23740                                                                  |
| Independent reflections                       | 8403 [R <sub>int</sub> = 0.0662, R <sub>sigma</sub> = 0.0779]          |
| Data/restraints/parameters                    | 8403/0/499                                                             |
| Goodness-of-fit on F <sup>2</sup>             | 1.038                                                                  |
| Final R indexes [ $ I  \geq 2\sigma(I)$ ]     | R <sub>1</sub> = 0.0534, wR <sub>2</sub> = 0.1131                      |
| Final R indexes [all data]                    | R <sub>1</sub> = 0.0888, wR <sub>2</sub> = 0.1353                      |
| Largest diff. peak/hole / e $\text{\AA}^{-3}$ | 1.43/-1.43                                                             |

Table S2 Fractional Atomic Coordinates ( $\times 10^4$ ) and Equivalent Isotropic Displacement Parameters ( $\text{\AA}^2 \times 10^3$ ) for 0925CMJCH3CH3\_0m. U<sub>eq</sub> is defined as 1/3 of the trace of the orthogonalised U<sub>ij</sub> tensor.

| Atom | x          | y           | z           | U(eq)      |
|------|------------|-------------|-------------|------------|
| Br1  | 4154.5 (7) | 9415.4 (5)  | 7787.2 (3)  | 46.85 (17) |
| Ni1  | 4385.6 (6) | 7317.1 (5)  | 8413.6 (3)  | 24.68 (15) |
| Br2  | 2413.5 (6) | 7143.3 (6)  | 9227.5 (3)  | 53.88 (19) |
| Cl1  | 6765 (2)   | 3267 (2)    | 5373.8 (9)  | 80.0 (5)   |
| Cl2  | 6345 (2)   | 1083.4 (17) | 6359.4 (10) | 83.9 (6)   |
| N1   | 5589 (3)   | 5921 (3)    | 7850.4 (15) | 17.4 (7)   |

|     |          |          |             |           |
|-----|----------|----------|-------------|-----------|
| N2  | 7504 (3) | 6086 (3) | 8241.3 (15) | 19.2 (7)  |
| N3  | 6391 (4) | 6834 (3) | 8664.3 (16) | 20.7 (7)  |
| C34 | 7017 (4) | 5460 (4) | 7870.7 (18) | 18.7 (8)  |
| C14 | 4519 (4) | 6103 (4) | 6873.8 (19) | 18.2 (8)  |
| C19 | 4910 (4) | 5393 (4) | 7492.1 (18) | 16.4 (8)  |
| C21 | 4749 (4) | 3575 (4) | 8475.7 (19) | 19.2 (8)  |
| C17 | 3907 (4) | 3812 (4) | 7381.2 (19) | 19.3 (8)  |
| C16 | 3592 (4) | 4456 (4) | 6751.6 (19) | 19.4 (8)  |
| C18 | 4539 (4) | 4265 (4) | 7767.2 (18) | 17.5 (8)  |
| C35 | 8195 (4) | 4333 (4) | 7598.4 (19) | 19.4 (8)  |
| C7  | 4794 (4) | 7392 (4) | 6596.1 (19) | 21.4 (9)  |
| C15 | 3881 (4) | 5599 (4) | 6518.9 (19) | 20.8 (9)  |
| C44 | 7037 (5) | 7418 (4) | 8924 (2)    | 22.4 (9)  |
| C22 | 3431 (4) | 3109 (4) | 8823.7 (19) | 19.7 (8)  |
| C23 | 3466 (5) | 1863 (4) | 8839.1 (19) | 22.9 (9)  |
| C42 | 8861 (4) | 6246 (4) | 8231 (2)    | 20.9 (9)  |
| C6  | 3491 (5) | 8423 (4) | 6251 (2)    | 22.7 (9)  |
| C8  | 6333 (5) | 7177 (4) | 6185 (2)    | 23.4 (9)  |
| C27 | 2151 (5) | 3964 (4) | 9143 (2)    | 26.8 (10) |
| C28 | 6235 (4) | 2436 (4) | 8551 (2)    | 23.7 (9)  |
| C40 | 9208 (4) | 3409 (4) | 8006 (2)    | 23.3 (9)  |

|     |           |          |          |           |
|-----|-----------|----------|----------|-----------|
| C43 | 8590 (5)  | 7043 (4) | 8671 (2) | 25.7 (9)  |
| C24 | 2277 (5)  | 1457 (4) | 9170 (2) | 25.8 (9)  |
| C13 | 6758 (5)  | 6583 (4) | 5631 (2) | 25.0 (9)  |
| C29 | 6933 (5)  | 1626 (4) | 8087 (2) | 29.0 (10) |
| C25 | 1023 (5)  | 2306 (5) | 9491 (2) | 29.7 (10) |
| C33 | 6836 (5)  | 2139 (5) | 9133 (2) | 30.7 (10) |
| C45 | 6144 (5)  | 8330 (4) | 9386 (2) | 28.4 (10) |
| C38 | 10450 (5) | 2186 (4) | 7129 (2) | 27.8 (10) |
| C36 | 8305 (5)  | 4165 (4) | 6954 (2) | 25.3 (9)  |
| C41 | 10279 (5) | 5722 (4) | 7781 (2) | 29.3 (10) |
| C9  | 7391 (5)  | 7525 (4) | 6378 (2) | 29.7 (10) |

Table S3 Anisotropic Displacement Parameters ( $\text{\AA}^2 \times 10^3$ ) for 0925CMJCH3CH3\_0m. The Anisotropic displacement factor exponent takes the form:  $-2\pi^2[h^2a^2U_{11}+2hka*b*U_{12}+\dots]$ .

| Atom | $U_{11}$  | $U_{22}$  | $U_{33}$  | $U_{23}$  | $U_{13}$  |
|------|-----------|-----------|-----------|-----------|-----------|
| Br1  | 69.9 (4)  | 25.7 (3)  | 38.2 (3)  | -11.1 (2) | -17.9 (3) |
| Ni1  | 16.1 (3)  | 30.2 (3)  | 28.3 (3)  | -14.4 (3) | -2.3 (2)  |
| Br2  | 37.1 (3)  | 57.1 (4)  | 69.4 (4)  | -29.1 (3) | 22.8 (3)  |
| Cl1  | 67.9 (11) | 97.0 (14) | 65.0 (11) | 5.2 (10)  | 4.0 (9)   |
| Cl2  | 92.3 (14) | 49.0 (10) | 90.1 (14) | -2.8 (9)  | -2.9 (11) |
| N1   | 15.5 (16) | 20.1 (18) | 15.2 (16) | -1.2 (14) | -4.5 (13) |
| N2   | 17.2 (16) | 21.4 (18) | 19.8 (17) | -6.8 (15) | -1.8 (13) |

|     |           |           |           |           |            |
|-----|-----------|-----------|-----------|-----------|------------|
| N3  | 20.4 (17) | 22.7 (19) | 19.4 (17) | -7.8 (15) | -3.6 (13)  |
| C34 | 23 (2)    | 20 (2)    | 14.9 (19) | -2.4 (17) | -4.2 (15)  |
| C14 | 14.5 (18) | 18 (2)    | 19.1 (19) | -2.6 (17) | -4.4 (15)  |
| C19 | 12.7 (18) | 17 (2)    | 17.2 (19) | -4.6 (16) | -1.1 (14)  |
| C21 | 23 (2)    | 17 (2)    | 18 (2)    | -0.7 (17) | -4.3 (16)  |
| C17 | 15.4 (19) | 20 (2)    | 23 (2)    | -4.2 (17) | -1.6 (16)  |
| C16 | 15.1 (19) | 22 (2)    | 21 (2)    | -6.2 (18) | 0.1 (15)   |
| C18 | 12.8 (18) | 17 (2)    | 19.8 (19) | -5.5 (17) | -0.8 (15)  |
| C35 | 17.7 (19) | 19 (2)    | 22 (2)    | -3.4 (17) | -4.1 (16)  |
| C7  | 21 (2)    | 23 (2)    | 21 (2)    | -4.9 (18) | -5.1 (16)  |
| C15 | 19 (2)    | 22 (2)    | 20 (2)    | -2.3 (17) | -5.6 (16)  |
| C44 | 26 (2)    | 21 (2)    | 21 (2)    | -1.0 (18) | -5.1 (17)  |
| C22 | 23 (2)    | 22 (2)    | 16.1 (19) | -2.1 (17) | -3.0 (16)  |
| C23 | 24 (2)    | 27 (2)    | 17 (2)    | -5.7 (18) | -1.3 (16)  |
| C42 | 18 (2)    | 23 (2)    | 25 (2)    | -3.6 (18) | -4.9 (16)  |
| C6  | 27 (2)    | 13 (2)    | 26 (2)    | -3.5 (18) | -8.3 (17)  |
| C8  | 24 (2)    | 17 (2)    | 26 (2)    | 5.0 (18)  | -8.2 (17)  |
| C27 | 29 (2)    | 21 (2)    | 29 (2)    | -4.4 (19) | -1.7 (18)  |
| C28 | 21 (2)    | 22 (2)    | 27 (2)    | 6.3 (18)  | -4.9 (17)  |
| C40 | 21 (2)    | 24 (2)    | 24 (2)    | -1.8 (19) | -4.2 (17)  |
| C43 | 23 (2)    | 27 (2)    | 32 (2)    | -3 (2)    | -11.0 (18) |



|     |        |        |        |           |           |
|-----|--------|--------|--------|-----------|-----------|
| C24 | 34 (2) | 27 (2) | 24 (2) | -5.4 (19) | -2.2 (18) |
| C13 | 23 (2) | 26 (2) | 25 (2) | -2.3 (19) | -5.3 (17) |
| C29 | 25 (2) | 26 (2) | 31 (2) | 1 (2)     | -4.2 (18) |
| C25 | 26 (2) | 42 (3) | 23 (2) | -5 (2)    | 0.3 (18)  |
| C33 | 29 (2) | 33 (3) | 32 (2) | 6 (2)     | -9.0 (19) |
| C45 | 32 (2) | 31 (3) | 23 (2) | -6 (2)    | -6.2 (18) |
| C38 | 20 (2) | 20 (2) | 42 (3) | -11 (2)   | -0.3 (19) |
| C36 | 27 (2) | 22 (2) | 24 (2) | -1.3 (19) | -4.3 (17) |
| C41 | 20 (2) | 33 (3) | 36 (3) | -8 (2)    | -0.1 (18) |
| C9  | 35 (2) | 25 (2) | 32 (2) | -2 (2)    | -8 (2)    |
| C20 | 37 (3) | 38 (3) | 27 (2) | -9 (2)    | -7.1 (19) |
| C39 | 18 (2) | 24 (2) | 37 (3) | -2 (2)    | -7.6 (18) |
| C26 | 23 (2) | 38 (3) | 29 (2) | -11 (2)   | 2.9 (18)  |
| C37 | 34 (2) | 26 (2) | 26 (2) | -10 (2)   | -4.2 (19) |
| C12 | 33 (3) | 26 (2) | 31 (2) | -2 (2)    | -1 (2)    |
| C10 | 30 (2) | 30 (3) | 45 (3) | 8 (2)     | -15 (2)   |
| C11 | 24 (2) | 34 (3) | 43 (3) | -1 (2)    | 0 (2)     |
| C32 | 37 (3) | 42 (3) | 44 (3) | 19 (3)    | -24 (2)   |
| C30 | 31 (3) | 29 (3) | 53 (3) | -4 (2)    | -1 (2)    |
| C31 | 31 (3) | 31 (3) | 73 (4) | 17 (3)    | -24 (3)   |
| C2  | 23 (2) | 32 (3) | 65 (4) | -6 (3)    | -7 (2)    |

|    |        |        |        |        |         |
|----|--------|--------|--------|--------|---------|
| C1 | 27 (2) | 31 (3) | 48 (3) | 9 (2)  | -4 (2)  |
| C3 | 41 (3) | 42 (3) | 44 (3) | 4 (3)  | -13 (2) |
| C5 | 34 (3) | 57 (4) | 66 (4) | 39 (3) | 7 (3)   |
| C4 | 50 (4) | 90 (5) | 67 (4) | 57 (4) | 13 (3)  |

Table S4 Bond Lengths for 0925CMJCH3CH3\_0m.

| Atom | Atom | Length/Å   | Atom | Atom | Length/Å  |
|------|------|------------|------|------|-----------|
| Br1  | Ni1  | 2.3732 (8) | C44  | C45  | 1.480 (6) |
| Ni1  | Br2  | 2.3130 (7) | C22  | C23  | 1.383 (6) |
| Ni1  | N1   | 2.033 (3)  | C22  | C27  | 1.399 (6) |
| Ni1  | N3   | 1.966 (3)  | C23  | C24  | 1.388 (6) |
| Cl1  | C47  | 1.722 (12) | C42  | C43  | 1.358 (6) |
| Cl1  | C46  | 1.656 (18) | C42  | C41  | 1.492 (6) |
| Cl2  | C47  | 1.659 (12) | C6   | C1   | 1.383 (6) |
| Cl2  | C46  | 1.709 (18) | C6   | C5   | 1.361 (7) |
| N1   | C34  | 1.287 (5)  | C8   | C13  | 1.392 (6) |
| N1   | C19  | 1.444 (5)  | C8   | C9   | 1.391 (6) |
| N2   | N3   | 1.385 (4)  | C27  | C26  | 1.394 (6) |
| N2   | C34  | 1.417 (5)  | C28  | C29  | 1.384 (6) |
| N2   | C42  | 1.389 (5)  | C28  | C33  | 1.390 (6) |
| N3   | C44  | 1.326 (5)  | C40  | C39  | 1.383 (6) |

|     |     |           |  |     |     |           |
|-----|-----|-----------|--|-----|-----|-----------|
| C34 | C35 | 1.485 (5) |  | C24 | C25 | 1.384 (6) |
| C14 | C19 | 1.407 (5) |  | C13 | C12 | 1.390 (6) |
| C14 | C7  | 1.532 (6) |  | C29 | C30 | 1.395 (6) |
| C14 | C15 | 1.391 (6) |  | C25 | C26 | 1.378 (7) |
| C19 | C18 | 1.410 (6) |  | C33 | C32 | 1.382 (7) |
| C21 | C18 | 1.532 (5) |  | C38 | C39 | 1.387 (6) |
| C21 | C22 | 1.538 (5) |  | C38 | C37 | 1.389 (6) |
| C21 | C28 | 1.531 (5) |  | C36 | C37 | 1.384 (6) |
| C17 | C16 | 1.393 (6) |  | C9  | C10 | 1.394 (6) |
| C17 | C18 | 1.397 (5) |  | C12 | C11 | 1.375 (7) |
| C16 | C15 | 1.375 (6) |  | C10 | C11 | 1.375 (7) |
| C16 | C20 | 1.507 (6) |  | C32 | C31 | 1.387 (8) |
| C35 | C40 | 1.399 (5) |  | C30 | C31 | 1.382 (7) |
| C35 | C36 | 1.393 (6) |  | C2  | C1  | 1.391 (6) |
| C7  | C6  | 1.537 (5) |  | C2  | C3  | 1.371 (7) |
| C7  | C8  | 1.517 (6) |  | C3  | C4  | 1.361 (8) |
| C44 | C43 | 1.417 (6) |  | C5  | C4  | 1.381 (8) |

Table S5 Bond Angles for 0925CMJCH3CH3\_0m.

| Atom | Atom | Atom | Angle/°    | Atom | Atom | Atom | Angle/°   |
|------|------|------|------------|------|------|------|-----------|
| Br2  | Ni1  | Br1  | 117.37 (3) | C23  | C22  | C21  | 122.4 (3) |
| N1   | Ni1  | Br1  | 110.22 (9) | C23  | C22  | C27  | 118.2 (4) |

|     |     |     |             |  |     |     |     |           |
|-----|-----|-----|-------------|--|-----|-----|-----|-----------|
| N1  | Ni1 | Br2 | 123.11 (10) |  | C27 | C22 | C21 | 119.4 (4) |
| N3  | Ni1 | Br1 | 99.24 (10)  |  | C22 | C23 | C24 | 121.2 (4) |
| N3  | Ni1 | Br2 | 118.80 (10) |  | N2  | C42 | C41 | 125.6 (4) |
| N3  | Ni1 | N1  | 80.20 (13)  |  | C43 | C42 | N2  | 106.3 (3) |
| C34 | N1  | Ni1 | 115.0 (3)   |  | C43 | C42 | C41 | 127.9 (4) |
| C34 | N1  | C19 | 121.3 (3)   |  | C1  | C6  | C7  | 119.3 (4) |
| C19 | N1  | Ni1 | 123.5 (2)   |  | C5  | C6  | C7  | 122.9 (4) |
| N3  | N2  | C34 | 115.9 (3)   |  | C5  | C6  | C1  | 117.7 (4) |
| N3  | N2  | C42 | 109.7 (3)   |  | C13 | C8  | C7  | 122.2 (4) |
| C42 | N2  | C34 | 134.0 (3)   |  | C9  | C8  | C7  | 119.7 (4) |
| N2  | N3  | Ni1 | 111.5 (2)   |  | C9  | C8  | C13 | 118.1 (4) |
| C44 | N3  | Ni1 | 134.4 (3)   |  | C26 | C27 | C22 | 120.6 (4) |
| C44 | N3  | N2  | 107.0 (3)   |  | C29 | C28 | C21 | 122.5 (4) |
| N1  | C34 | N2  | 114.3 (3)   |  | C29 | C28 | C33 | 118.7 (4) |
| N1  | C34 | C35 | 129.6 (4)   |  | C33 | C28 | C21 | 118.6 (4) |
| N2  | C34 | C35 | 116.0 (3)   |  | C39 | C40 | C35 | 120.7 (4) |
| C19 | C14 | C7  | 121.0 (3)   |  | C42 | C43 | C44 | 107.8 (4) |
| C15 | C14 | C19 | 118.2 (4)   |  | C25 | C24 | C23 | 120.1 (4) |
| C15 | C14 | C7  | 120.8 (3)   |  | C12 | C13 | C8  | 120.8 (4) |
| C14 | C19 | N1  | 117.5 (3)   |  | C28 | C29 | C30 | 120.6 (4) |
| C14 | C19 | C18 | 120.6 (4)   |  | C26 | C25 | C24 | 119.7 (4) |

|     |     |     |           |  |     |     |     |           |
|-----|-----|-----|-----------|--|-----|-----|-----|-----------|
| C18 | C19 | N1  | 121.8 (3) |  | C32 | C33 | C28 | 121.0 (5) |
| C18 | C21 | C22 | 112.0 (3) |  | C39 | C38 | C37 | 119.2 (4) |
| C28 | C21 | C18 | 115.1 (3) |  | C37 | C36 | C35 | 119.3 (4) |
| C28 | C21 | C22 | 109.1 (3) |  | C8  | C9  | C10 | 120.8 (4) |
| C16 | C17 | C18 | 122.4 (4) |  | C40 | C39 | C38 | 120.0 (4) |
| C17 | C16 | C20 | 121.7 (4) |  | C25 | C26 | C27 | 120.2 (4) |
| C15 | C16 | C17 | 117.8 (4) |  | C36 | C37 | C38 | 121.4 (4) |
| C15 | C16 | C20 | 120.5 (4) |  | C11 | C12 | C13 | 120.2 (4) |
| C19 | C18 | C21 | 122.0 (3) |  | C11 | C10 | C9  | 120.1 (4) |
| C17 | C18 | C19 | 117.9 (4) |  | C12 | C11 | C10 | 119.9 (4) |
| C17 | C18 | C21 | 120.1 (4) |  | C33 | C32 | C31 | 120.1 (5) |
| C40 | C35 | C34 | 118.7 (3) |  | C31 | C30 | C29 | 120.2 (5) |
| C36 | C35 | C34 | 121.9 (4) |  | C30 | C31 | C32 | 119.4 (4) |
| C36 | C35 | C40 | 119.4 (4) |  | C3  | C2  | C1  | 120.0 (5) |
| C14 | C7  | C6  | 112.6 (3) |  | C6  | C1  | C2  | 121.2 (5) |
| C8  | C7  | C14 | 111.4 (3) |  | C4  | C3  | C2  | 118.6 (5) |
| C8  | C7  | C6  | 114.1 (3) |  | C6  | C5  | C4  | 121.1 (5) |
| C16 | C15 | C14 | 122.9 (4) |  | C3  | C4  | C5  | 121.4 (5) |
| N3  | C44 | C43 | 109.2 (4) |  | C12 | C47 | C11 | 119.4 (7) |
| N3  | C44 | C45 | 121.0 (4) |  | C11 | C46 | C12 | 120.3 (8) |
| C43 | C44 | C45 | 129.8 (4) |  |     |     |     |           |

Table S6 Hydrogen Atom Coordinates ( $\text{\AA}\times 10^4$ ) and Isotropic Displacement Parameters ( $\text{\AA}^2\times 10^3$ ) for 0925CMJCH3CH3\_0m.

| Atom | <i>x</i> | <i>y</i> | <i>z</i> | U(eq) |
|------|----------|----------|----------|-------|
| H21  | 4741     | 4238     | 8720.1   | 23    |
| H17  | 3684     | 3036     | 7554.23  | 23    |
| H7   | 4820     | 7743     | 6984.98  | 26    |
| H15  | 3633     | 6066     | 6097.37  | 25    |
| H23  | 4320     | 1273     | 8619.02  | 27    |
| H27  | 2096     | 4828     | 9134.02  | 32    |
| H40  | 9129     | 3514     | 8447.03  | 28    |
| H43  | 9313     | 7303     | 8787.35  | 31    |
| H24  | 2325     | 596      | 9176.94  | 31    |
| H13  | 6050     | 6348     | 5486.06  | 30    |
| H29  | 6540     | 1819     | 7685.84  | 35    |
| H25  | 212.6    | 2027     | 9720.82  | 36    |
| H33  | 6369     | 2689     | 9454.98  | 37    |
| H45A | 6231     | 9189     | 9206.51  | 43    |
| H45B | 6525     | 8002     | 9810.79  | 43    |
| H45C | 5085     | 8405     | 9448.21  | 43    |
| H38  | 11223    | 1462     | 6964.87  | 33    |
| H36  | 7613     | 4775     | 6674.37  | 30    |

|      |       |       |         |     |
|------|-------|-------|---------|-----|
| H41A | 10751 | 4785  | 7932.03 | 44  |
| H41B | 10972 | 6168  | 7781.24 | 44  |
| H41C | 10047 | 5867  | 7334.01 | 44  |
| H9   | 7120  | 7948  | 6749.24 | 36  |
| H20A | 3124  | 3023  | 6487.04 | 47  |
| H20B | 3286  | 4145  | 5880.8  | 47  |
| H20C | 1792  | 4405  | 6409.43 | 47  |
| H39  | 11001 | 1718  | 8055.22 | 32  |
| H26  | 90.28 | 4147  | 9689    | 38  |
| H37  | 9516  | 2988  | 6286.63 | 34  |
| H12  | 8478  | 5931  | 4907.17 | 39  |
| H10  | 9558  | 7498  | 6172.59 | 41  |
| H11  | 10240 | 6469  | 5261.16 | 44  |
| H32  | 8503  | 867.5 | 9649.96 | 48  |
| H30  | 8679  | -22.5 | 7883.27 | 48  |
| H31  | 9659  | -510  | 8867.56 | 56  |
| H2   | -189  | 9645  | 6467.96 | 51  |
| H1   | 1841  | 8085  | 6960.99 | 47  |
| H3   | 242.8 | 10987 | 5479.4  | 61  |
| H5   | 4708  | 9151  | 5471.72 | 85  |
| H4   | 2694  | 10732 | 4997.96 | 118 |

|      |      |      |         |    |
|------|------|------|---------|----|
| H47A | 8046 | 1985 | 6186.88 | 84 |
| H47B | 6442 | 2919 | 6470.54 | 84 |
| H46A | 7646 | 1191 | 5359.93 | 83 |
| H46B | 5885 | 1789 | 5328.99 | 83 |

Table S7 Atomic Occupancy for 0925CMJCH3CH3\_0m.

| Atom | Occupancy | Atom | Occupancy | Atom | Occupancy |
|------|-----------|------|-----------|------|-----------|
| C47  | 0.6       | H47A | 0.6       | H47B | 0.6       |
| C46  | 0.4       | H46A | 0.4       | H46B | 0.4       |

### Reference

[1] N. Y. Na, S. Y. Dai, C. L. Chen *Macromolecules*, 2018, **51**, 4040-4048
